# Supplementary material for: AlCl3 catalyzed coupling of N-benzylic sulfonamides with 2-substituted cyanoacetates through carbon–nitrogen bond cleavage
Source: Royal Society of Chemistry journal article supplement (doi:10.1039/c7ob01025g), 2017-01-01

# **AlCl<sub>3</sub> Catalyzed Coupling of N-benzylic Sulfonamides with 2-Substituted Cyanoacetates through Carbon-Nitrogen Bond Cleavage**

Chen Hu, Gang Hong, Xiaofei Qian, Kwang Rin Kim, Xiaoyan Zhu, and Limin Wang\*

## **SUPPORTING INFORMATION**

### **contents**

|                                                                                |   |
|--------------------------------------------------------------------------------|---|
| SUPPORTING INFORMATION.....                                                    | 1 |
| EXPERIMENTAL SECTION.....                                                      | 2 |
| 1.1 Synthesis of N-benzylic sulfonamides <sup>1</sup> .....                    | 2 |
| 1.2 Synthesis of substituted cyanoacetates <sup>2</sup> .....                  | 3 |
| 1.3 Synthesis of 2-nitroesters <sup>3</sup> .....                              | 3 |
| 1.4 Synthesis of substituted malononitrile <sup>4</sup> .....                  | 3 |
| 1.5 Synthesis of substituted diethyl malonate <sup>5</sup> .....               | 3 |
| 1.6 General Experimental Procedures and Characterizations.....                 | 4 |
| 1.7 Reference.....                                                             | 4 |
| Copies of <sup>1</sup> H NMR, <sup>13</sup> C NMR and <sup>19</sup> F NMR..... | 5 |

## EXPERIMENTAL SECTION

**General Information.**  $^1\text{H}$  NMR,  $^{13}\text{C}$  NMR and  $^{19}\text{F}$  NMR spectra were recorded at 400 MHz, 100 MHz and 376 MHz respectively using tetramethylsilane as an internal reference. Chemical shifts ( $\delta$ ) and coupling constants ( $J$ ) were expressed in parts per million and hertz, respectively. Melting points were uncorrected. High-resolution mass spectrometry (HRMS) was performed on an ESI-TOF spectrometer. Chemicals were commercially available and used without purification. Chromatography: Column chromatography was performed with silica gel (200-300 mesh ASTM).

### 1.1 Synthesis of N-benzylic sulfonamides<sup>1</sup>

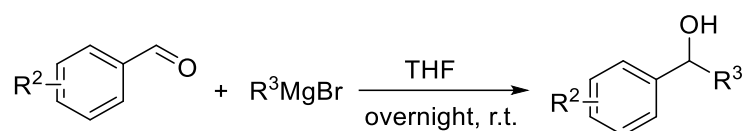

To an over-dried, argon purged round flask containing the aldehyde (5 mmol) in the THF (10 mL) at room temperature, was added phenylmagnesium bromide (15 mmol) dropwise over 5 minutes. The reaction was then allowed to stir overnight. The reaction mixture was quenched by addition of the saturated aqueous ammonium chloride (40 mL) and extracted with ethyl ether ( $2 \times 40$  mL). The combined organic layers were washed with brine, dried with  $\text{Na}_2\text{SO}_4$ . Purification was performed by flash column chromatography on silica gel when needed.

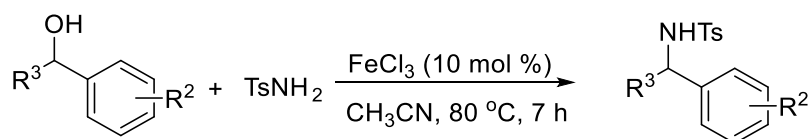

To a stirred solution of diphenylmethanol (1 mmol) in 10 mL anhydrous  $\text{CH}_3\text{CN}$  was added 4-methylbenzenesulfonamide (1.1 mmol) and  $\text{FeCl}_3$  (0.1 mmol) successively at  $80\text{ }^\circ\text{C}$ . After 7 hours, the crude product was purified by column chromatography on silica gel to afford the corresponding product.

## 1.2 Synthesis of substituted cyanoacetates<sup>2</sup>

A solution of cyanoethyl acetate (20 mmol) in 20 mL THF was added to a suspension of sodium hydride (7 mmol) and THF (10 mL) under argon atmosphere at 0 °C. After 30 min, a solution of hydrocarbon bromide (7 mmol) in THF was slowly added and after stirring the suspension for 15 min at 0 °C, the reaction mixture was removed to warm temperature and stirring for 8 h. The reaction was then quenched with 1M HCl and extracted using EtOAc (3×50 mL). The organic layer was dried by Na<sub>2</sub>SO<sub>4</sub>. Purification was performed by flash column chromatography on silica gel when needed.

## 1.3 Synthesis of 2-nitroesters<sup>3</sup>

The alkyl 2-bromoalkanoate (60 mmol) was added to a suspension of sodium hydride (104 mmol) and phloroglucinol dehydrate (52 mol) in dry DMF (40 mL) at room temperature. After 2.5 h, the reaction was then quenched with ice water (200 mL) and extracted using EtOAc (3×50 mL). The organic layer was dried by Na<sub>2</sub>SO<sub>4</sub>. Purification was performed by flash column chromatography on silica gel when needed.

## 1.4 Synthesis of substituted malononitrile<sup>4</sup>

A solution of malononitrile (20 mmol) in 20 mL THF was added to a suspension of sodium hydride (7 mmol) and THF (10 mL) under argon atmosphere at 0 °C. After 30 min, a solution of hydrocarbon bromide (7 mmol) in THF was slowly added and after stirring the suspension for 15 min at 0 °C, the reaction mixture was removed to warm temperature and stirring for 8 h. The reaction was then quenched with 1M HCl and extracted using EtOAc (3×50 mL). The organic layer was dried by Na<sub>2</sub>SO<sub>4</sub>. Purification was performed by flash column chromatography on silica gel when needed.

## 1.5 Synthesis of substituted diethyl malonate<sup>5</sup>

To a solution of diethyl malonate (20 mmol) in 20 mL THF was added to a suspension of sodium

hydride (7 mmol) and THF (10 mL) under argon atmosphere at 0 °C. After 30 min, a solution of hydrocarbon bromide (7 mmol) in THF was slowly added and after stirring the suspension for 15 min at 0 °C, the reaction mixture was removed to warm temperature and stirring for 8 h. The reaction was then quenched with 1M HCl and extracted using EtOAc (3 × 50 mL). The organic layer was dried by Na<sub>2</sub>SO<sub>4</sub>. Purification was performed by flash column chromatography on silica gel when needed.

### 1.6 General Experimental Procedures and Characterizations.

2-substituted cyanoacetates (0.25 mmol, 1 equiv), *N*-benzylic sulfonamides (0.3 mmol, 1.2 equiv), AlCl<sub>3</sub> (100 mol %), dry CHCl<sub>3</sub> (1 mL) and a stir bar were added to a sealed tube. After being stirred at 80 °C for indicated time, the mixture was evaporated under vacuum. The corresponding product was isolated by silica gel column chromatography with a dichloromethane/petroleum ether mixture as eluent.

### 1.7 Reference

- [1] (a) H. Li, R.Y. Zhu, W. J. Shi, K. H. He and Z. J. Shi, *Org. Lett.*, 2012, **14**, 4850. (b) U. Jana, S. Maiti, S. Biswas, *Tetrahedron Lett.*, 2008, **48**, 858.
- [2] (a) C. J. Mallia, L. Englert, G. C. Walter and I. R. Baxendale, *Beilstein J. Org. Chem.*, 2015, **11**, 875. (b) X. Y. Zhang, X. F. Jia, L. L. Fang, N. Liu, J. J. Wang and X. S. Fan, *Org. Lett.*, 2011, **13**, 5024.
- [3] J. Ramírez, D. P. Huber and A. Togni, *Synlett.*, 2007, **7**, 1143.
- [4] A. Schnyder, A. F. Indolese, T. Maetzke, J. Wenger, H. U. Blaser, *Synlett*, 2006, **18**, 3167.
- [5] K. Yoshihisa, C. Werngard and K. Yoshito, *Org. Lett.*, 2003, **5**, 93.

# Copies of $^1\text{H}$ NMR, $^{13}\text{C}$ NMR and $^{19}\text{F}$ NMR

3a

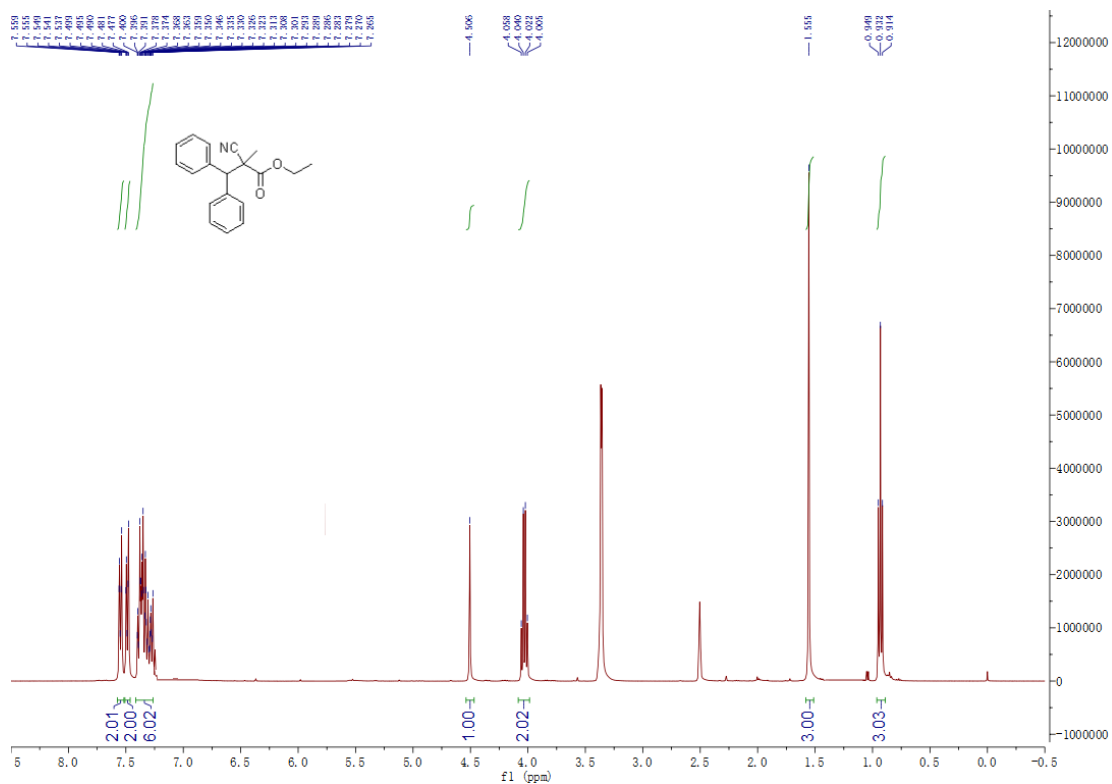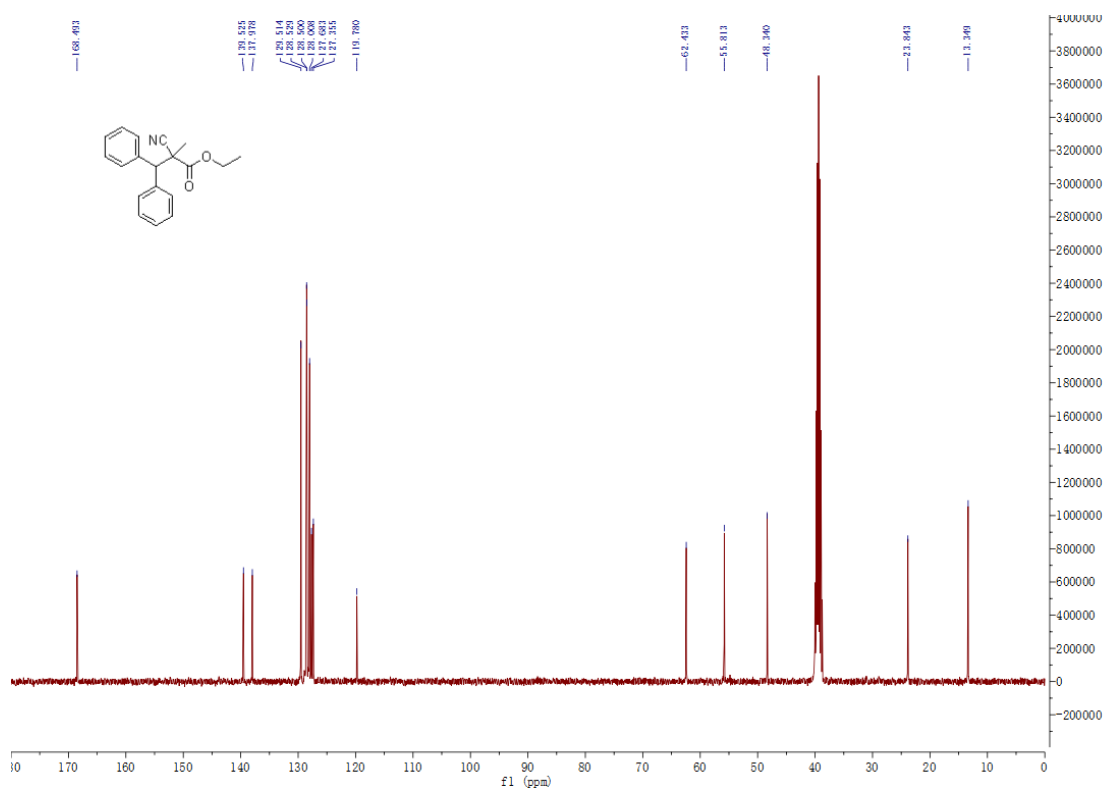

[illegible]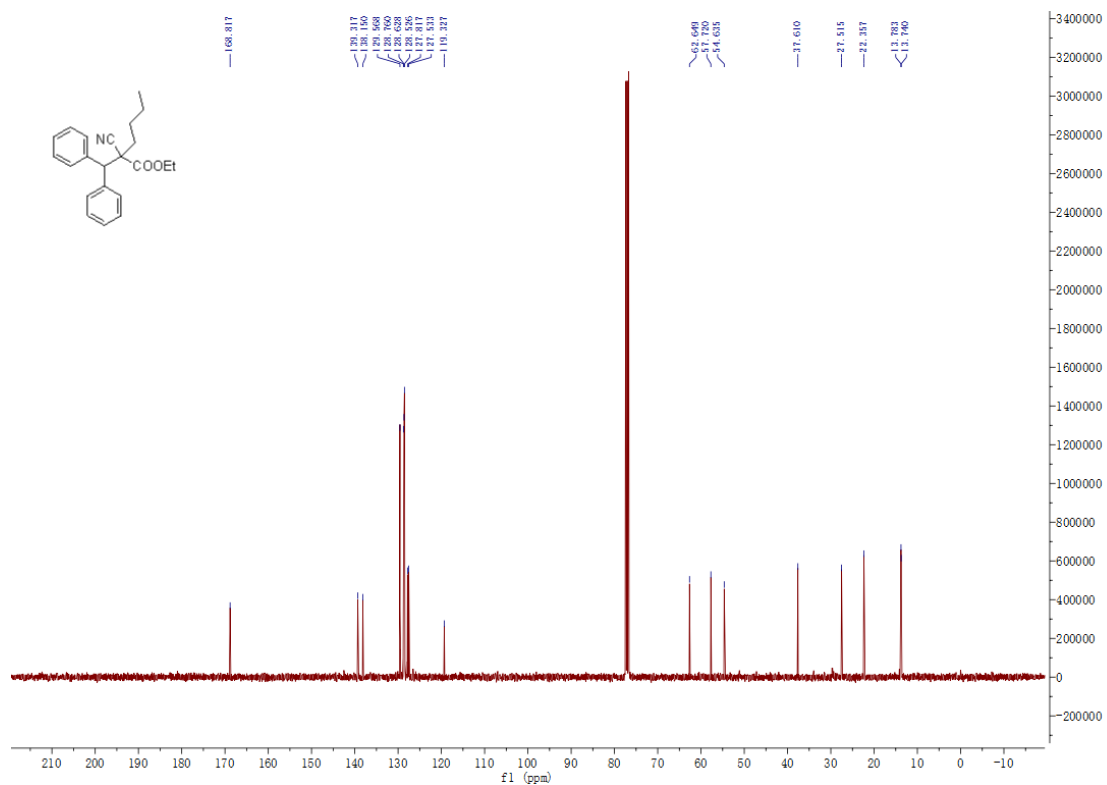

3c

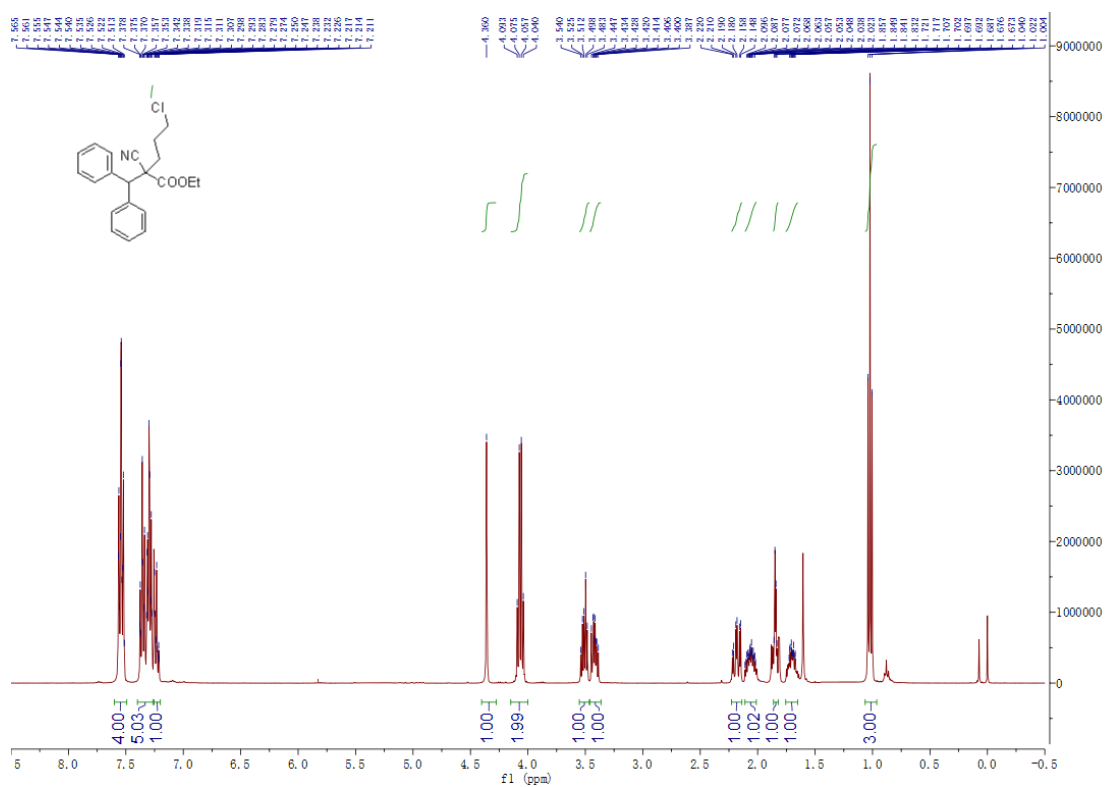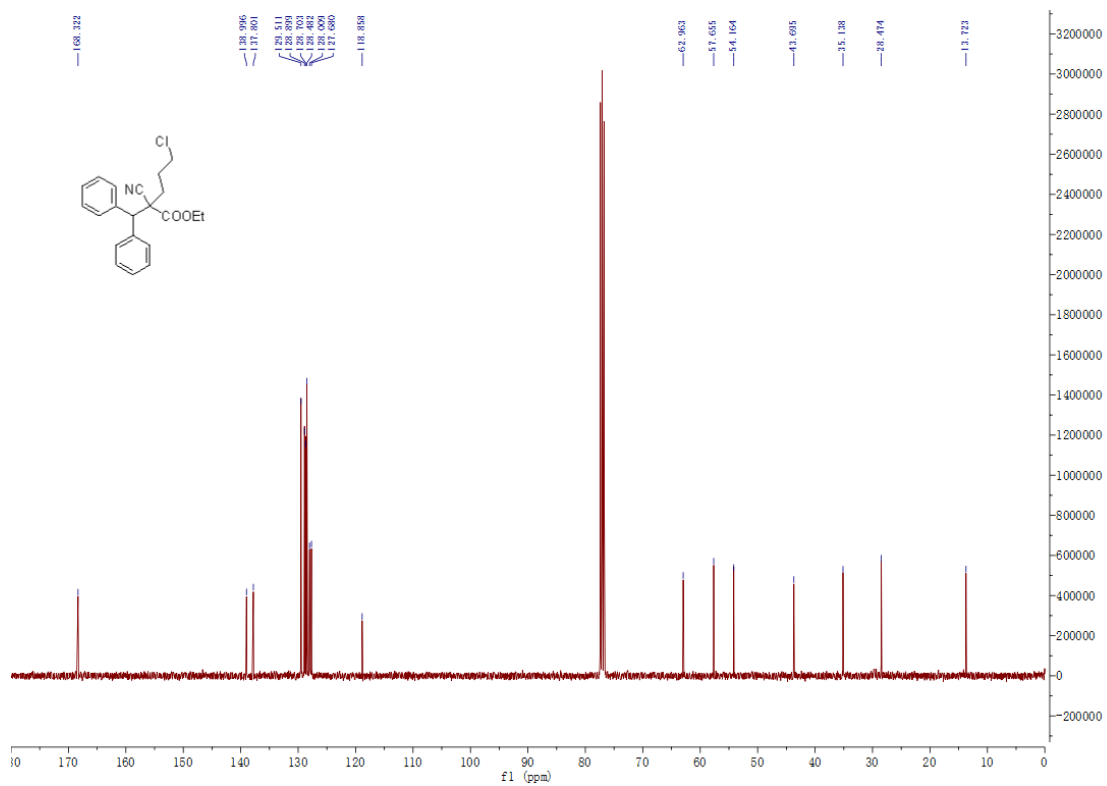

3d

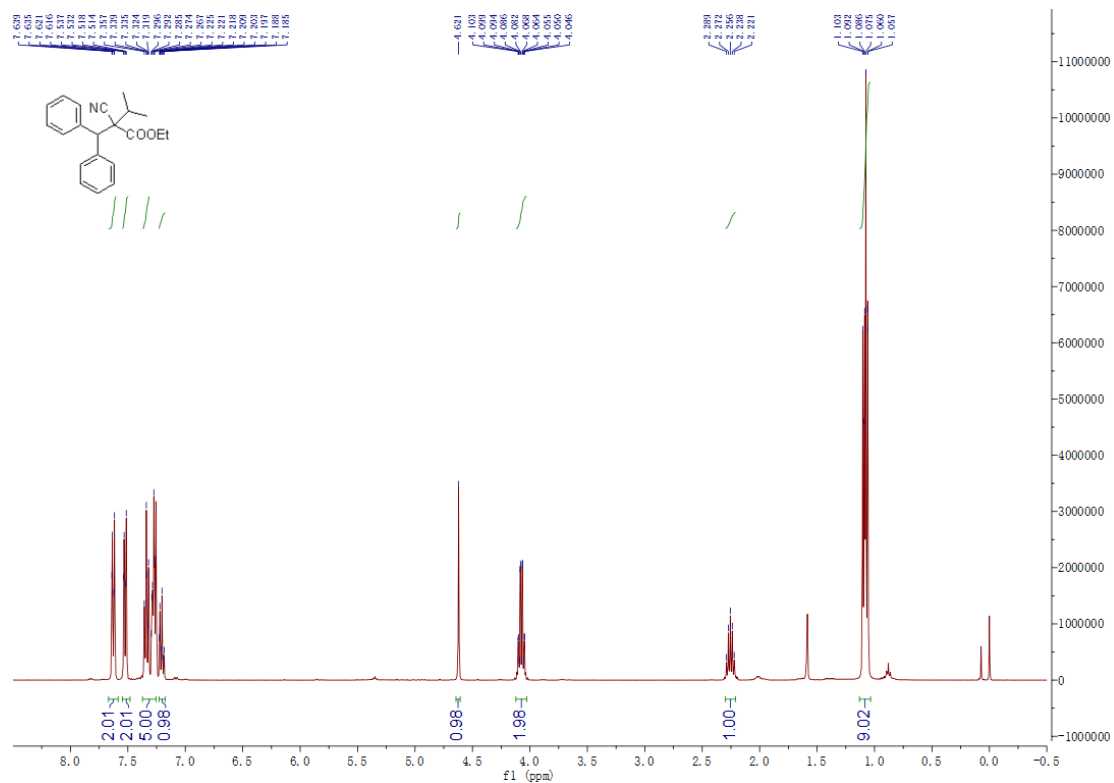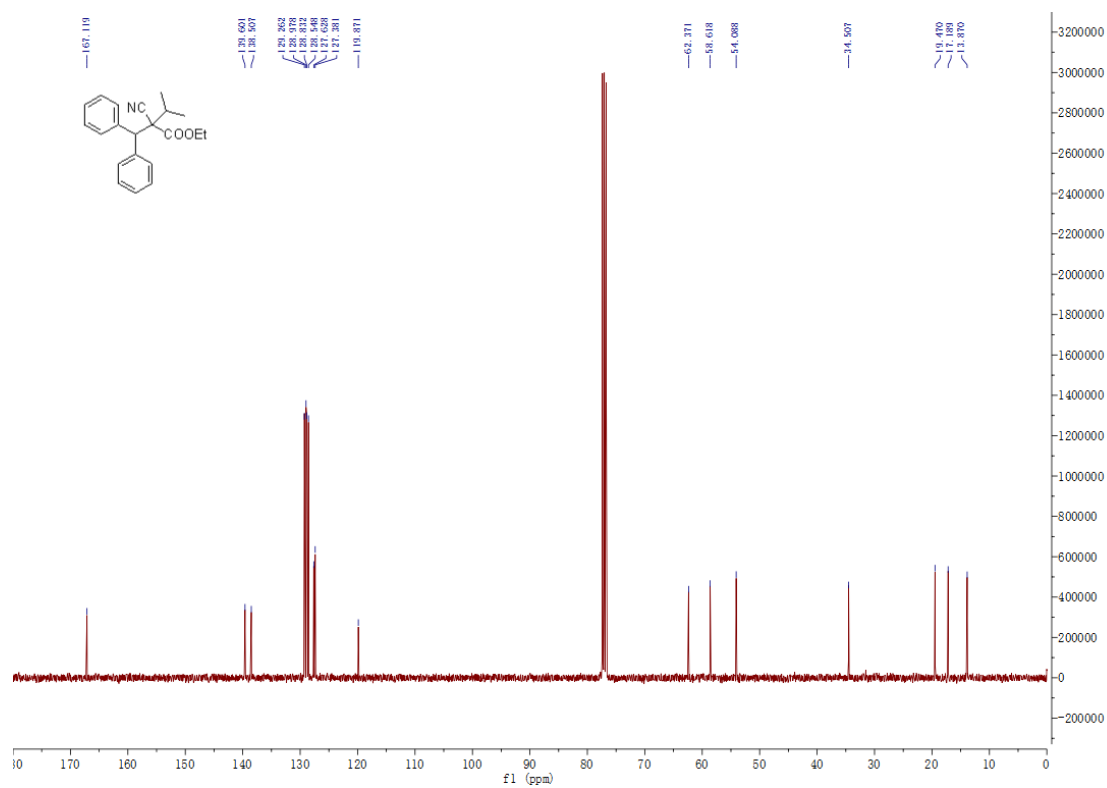



Chemical structure: CCOC(=O)C(C=C)C(=O)c1ccccc1

<sup>1</sup>H NMR spectrum (CDCl<sub>3</sub>) showing peaks from 0 to 8 ppm. The x-axis is labeled 'f1 (ppm)' and ranges from -0.5 to 10.0. The y-axis represents intensity from 0 to 10,000,000. The spectrum includes the following peaks and integrations:

- 7.511 ppm (d, 4.02H)
- 7.502 ppm (d, 5.00H)
- 7.500 ppm (d, 1.02H)
- 7.496 ppm (d, 1.02H)
- 7.532 ppm (d, 1.02H)
- 7.528 ppm (d, 1.02H)
- 7.376 ppm (d, 1.02H)
- 7.355 ppm (d, 1.02H)
- 7.350 ppm (d, 1.02H)
- 7.346 ppm (d, 1.02H)
- 7.336 ppm (d, 1.02H)
- 7.325 ppm (d, 1.02H)
- 7.314 ppm (d, 1.02H)
- 7.305 ppm (d, 1.02H)
- 7.296 ppm (d, 1.02H)
- 7.285 ppm (d, 1.02H)
- 7.277 ppm (d, 1.02H)
- 7.269 ppm (d, 1.02H)
- 7.260 ppm (d, 1.02H)
- 7.243 ppm (d, 1.02H)
- 7.232 ppm (d, 1.02H)
- 7.213 ppm (d, 1.02H)
- 7.200 ppm (d, 1.02H)
- 5.825 ppm (d, 1.02H)
- 5.799 ppm (d, 1.02H)
- 5.804 ppm (d, 1.02H)
- 5.788 ppm (d, 1.02H)
- 5.757 ppm (d, 1.02H)
- 5.747 ppm (d, 1.02H)
- 5.737 ppm (d, 1.02H)
- 5.741 ppm (d, 1.02H)
- 5.787 ppm (d, 1.02H)
- 5.771 ppm (d, 1.02H)
- 5.733 ppm (d, 1.02H)
- 5.725 ppm (d, 1.02H)
- 5.716 ppm (d, 1.02H)
- 5.705 ppm (d, 1.02H)
- 5.696 ppm (d, 1.02H)
- 5.686 ppm (d, 1.02H)
- 5.676 ppm (d, 1.02H)
- 5.666 ppm (d, 1.02H)
- 5.656 ppm (d, 1.02H)
- 5.646 ppm (d, 1.02H)
- 5.636 ppm (d, 1.02H)
- 5.626 ppm (d, 1.02H)
- 5.616 ppm (d, 1.02H)
- 5.606 ppm (d, 1.02H)
- 5.596 ppm (d, 1.02H)
- 5.586 ppm (d, 1.02H)
- 5.576 ppm (d, 1.02H)
- 5.566 ppm (d, 1.02H)
- 5.556 ppm (d, 1.02H)
- 5.546 ppm (d, 1.02H)
- 5.536 ppm (d, 1.02H)
- 5.526 ppm (d, 1.02H)
- 5.516 ppm (d, 1.02H)
- 5.506 ppm (d, 1.02H)
- 5.496 ppm (d, 1.02H)
- 5.486 ppm (d, 1.02H)
- 5.476 ppm (d, 1.02H)
- 5.466 ppm (d, 1.02H)
- 5.456 ppm (d, 1.02H)
- 5.446 ppm (d, 1.02H)
- 5.436 ppm (d, 1.02H)
- 5.426 ppm (d, 1.02H)
- 5.416 ppm (d, 1.02H)
- 5.406 ppm (d, 1.02H)
- 5.396 ppm (d, 1.02H)
- 5.386 ppm (d, 1.02H)
- 5.376 ppm (d, 1.02H)
- 5.366 ppm (d, 1.02H)
- 5.356 ppm (d, 1.02H)
- 5.346 ppm (d, 1.02H)
- 5.336 ppm (d, 1.02H)
- 5.326 ppm (d, 1.02H)
- 5.316 ppm (d, 1.02H)
- 5.306 ppm (d, 1.02H)
- 5.296 ppm (d, 1.02H)
- 5.286 ppm (d, 1.02H)
- 5.276 ppm (d, 1.02H)
- 5.266 ppm (d, 1.02H)
- 5.256 ppm (d, 1.02H)
- 5.246 ppm (d, 1.02H)
- 5.236 ppm (d, 1.02H)
- 5.226 ppm (d, 1.02H)
- 5.216 ppm (d, 1.02H)
- 5.206 ppm (d, 1.02H)
- 5.196 ppm (d, 1.02H)
- 5.186 ppm (d, 1.02H)
- 5.176 ppm (d, 1.02H)
- 5.166 ppm (d, 1.02H)
- 5.156 ppm (d, 1.02H)
- 5.146 ppm (d, 1.02H)
- 5.136 ppm (d, 1.02H)
- 5.126 ppm (d, 1.02H)
- 5.116 ppm (d, 1.02H)
- 5.106 ppm (d, 1.02H)
- 5.096 ppm (d, 1.02H)
- 5.086 ppm (d, 1.02H)
- 5.076 ppm (d, 1.02H)
- 5.066 ppm (d, 1.02H)
- 5.056 ppm (d, 1.02H)
- 5.046 ppm (d, 1.02H)
- 5.036 ppm (d, 1.02H)
- 5.026 ppm (d, 1.02H)
- 5.016 ppm (d, 1.02H)
- 5.006 ppm (d, 1.02H)
- 4.996 ppm (d, 1.02H)
- 4.986 ppm (d, 1.02H)
- 4.976 ppm (d, 1.02H)
- 4.966 ppm (d, 1.02H)
- 4.956 ppm (d, 1.02H)
- 4.946 ppm (d, 1.02H)
- 4.936 ppm (d, 1.02H)
- 4.926 ppm (d, 1.02H)
- 4.916 ppm (d, 1.02H)
- 4.906 ppm (d, 1.02H)
- 4.896 ppm (d, 1.02H)
- 4.886 ppm (d, 1.02H)
- 4.876 ppm (d, 1.02H)
- 4.866 ppm (d, 1.02H)
- 4.856 ppm (d, 1.02H)
- 4.846 ppm (d, 1.02H)
- 4.836 ppm (d, 1.02H)
- 4.826 ppm (d, 1.02H)
- 4.816 ppm (d, 1.02H)
- 4.806 ppm (d, 1.02H)
- 4.796 ppm (d, 1.02H)
- 4.786 ppm (d, 1.02H)
- 4.776 ppm (d, 1.02H)
- 4.766 ppm (d, 1.02H)
- 4.756 ppm (d, 1.02H)
- 4.746 ppm (d, 1.02H)
- 4.736 ppm (d, 1.02H)
- 4.726 ppm (d, 1.02H)
- 4.716 ppm (d, 1.02H)
- 4.706 ppm (d, 1.02H)
- 4.696 ppm (d, 1.02H)
- 4.686 ppm (d, 1.02H)
- 4.676 ppm (d, 1.02H)
- 4.666 ppm (d, 1.02H)
- 4.656 ppm (d, 1.02H)
- 4.646 ppm (d, 1.02H)
- 4.636 ppm (d, 1.02H)
- 4.626 ppm (d, 1.02H)
- 4.616 ppm (d, 1.02H)
- 4.606 ppm (d, 1.02H)
- 4.596 ppm (d, 1.02H)
- 4.586 ppm (d, 1.02H)
- 4.576 ppm (d, 1.02H)
- 4.566 ppm (d, 1.02H)
- 4.556 ppm (d, 1.02H)
- 4.546 ppm (d, 1.02H)
- 4.536 ppm (d, 1.02H)
- 4.526 ppm (d, 1.02H)
- 4.516 ppm (d, 1.02H)
- 4.506 ppm (d, 1.02H)
- 4.496 ppm (d, 1.02H)
- 4.486 ppm (d, 1.02H)
- 4.476 ppm (d, 1.02H)
- 4.466 ppm (d, 1.02H)
- 4.456 ppm (d, 1.02H)
- 4.446 ppm (d, 1.02H)
- 4.436 ppm (d, 1.02H)
- 4.426 ppm (d, 1.02H)
- 4.416 ppm (d, 1.02H)
- 4.406 ppm (d, 1.02H)
- 4.396 ppm (d, 1.02H)
- 4.386 ppm (d, 1.02H)
- 4.376 ppm (d, 1.02H)
- 4.366 ppm (d, 1.02H)
- 4.356 ppm (d, 1.02H)
- 4.346 ppm (d, 1.02H)
- 4.336 ppm (d, 1.02H)
- 4.326 ppm (d, 1.02H)
- 4.316 ppm (d, 1.02H)
- 4.306 ppm (d, 1.02H)
- 4.296 ppm (d, 1.02H)
- 4.286 ppm (d, 1.02H)
- 4.276 ppm (d, 1.02H)
- 4.266 ppm (d, 1.02H)
- 4.256 ppm (d, 1.02H)
- 4.246 ppm (d, 1.02H)
- 4.236 ppm (d, 1.02H)
- 4.226 ppm (d, 1.02H)
- 4.216 ppm (d, 1.02H)
- 4.206 ppm (d, 1.02H)
- 4.196 ppm (d, 1.02H)
- 4.186 ppm (d, 1.02H)
- 4.176 ppm (d, 1.02H)
- 4.166 ppm (d, 1.02H)
- 4.156 ppm (d, 1.02H)
- 4.146 ppm (d, 1.02H)
- 4.136 ppm (d, 1.02H)
- 4.126 ppm (d, 1.02H)
- 4.116 ppm (d,

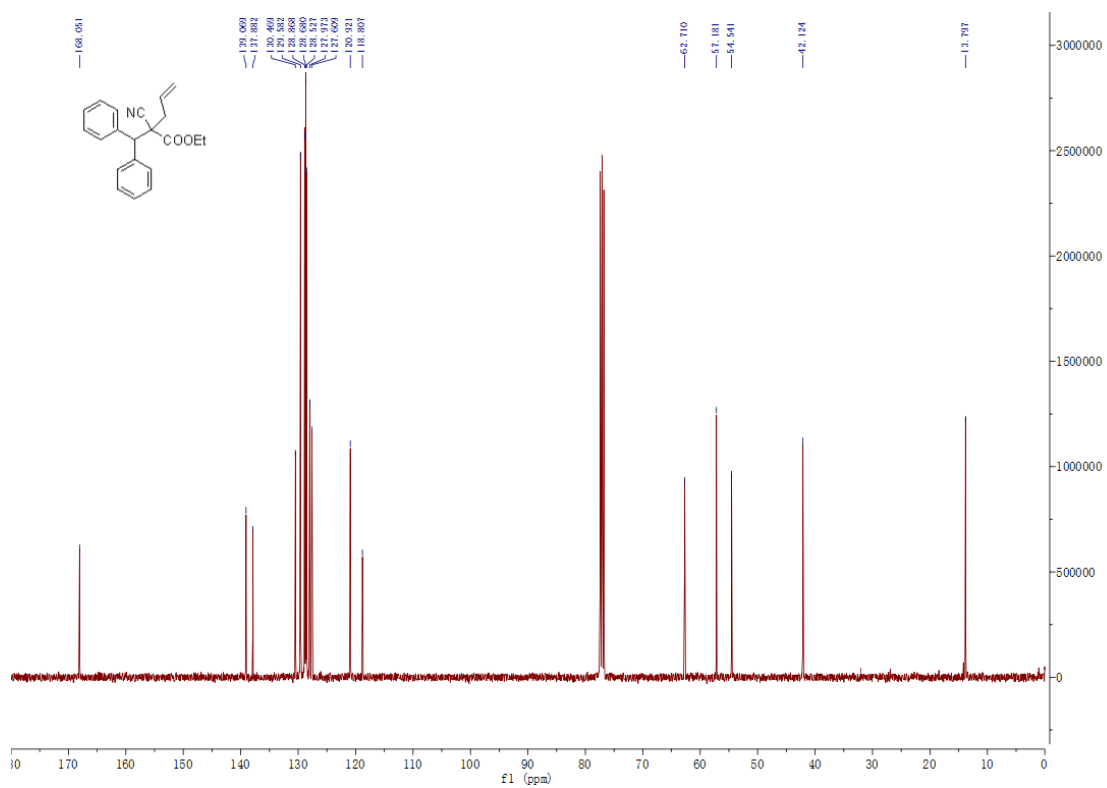

Chemical structure: CCOC(=O)C(c1ccccc1)C(=O)c2ccccc2CCF(C)(F)F

<sup>1</sup>H NMR spectrum (CDCl<sub>3</sub>) showing peaks from 0 to 9 ppm. The spectrum includes aromatic protons (7.2-7.6 ppm), nitrile proton (2.1 ppm), ethyl ester protons (2.3 ppm quartet, 1.2 ppm triplet), and 2,2,2-trifluoroethyl protons (2.7-2.9 ppm multiplet). Integration values are provided below the baseline.

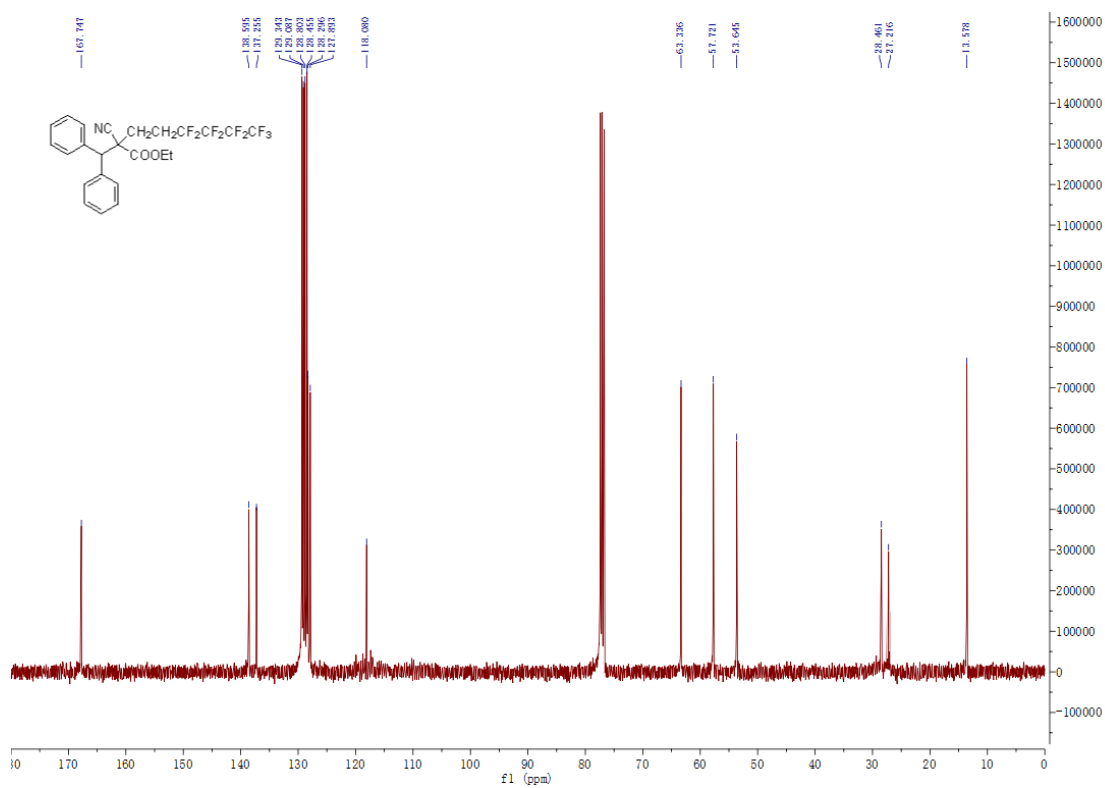



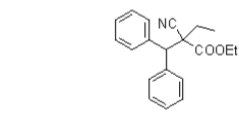CCOC(=O)C(C#N)(c1ccccc1)c2ccccc2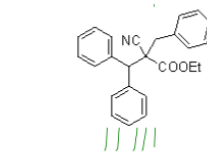

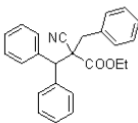

CCOC(=O)C(c1ccccc1)(c2ccccc2)c3cc(Br)ccc3

<sup>1</sup>H NMR spectrum (CDCl<sub>3</sub>) of ethyl 2-(2-bromophenyl)-2,2-diphenylacetate. The spectrum shows peaks in the aromatic region (7.0-7.6 ppm) and aliphatic region (1.4-1.6 ppm). Integration values are provided below the peaks.

| Chemical Shift (ppm) | Integration |
|----------------------|-------------|
| 7.53                 | 2.00        |
| 7.51                 | 1.99        |
| 7.48                 | 3.96        |
| 7.46                 | 3.01        |
| 7.44                 | 1.00        |
| 7.42                 | 2.01        |
| 4.48                 | 1.00        |
| 3.88                 | 2.01        |
| 3.12                 | 0.99        |
| 3.08                 | 0.99        |
| 1.52                 | 3.02        |

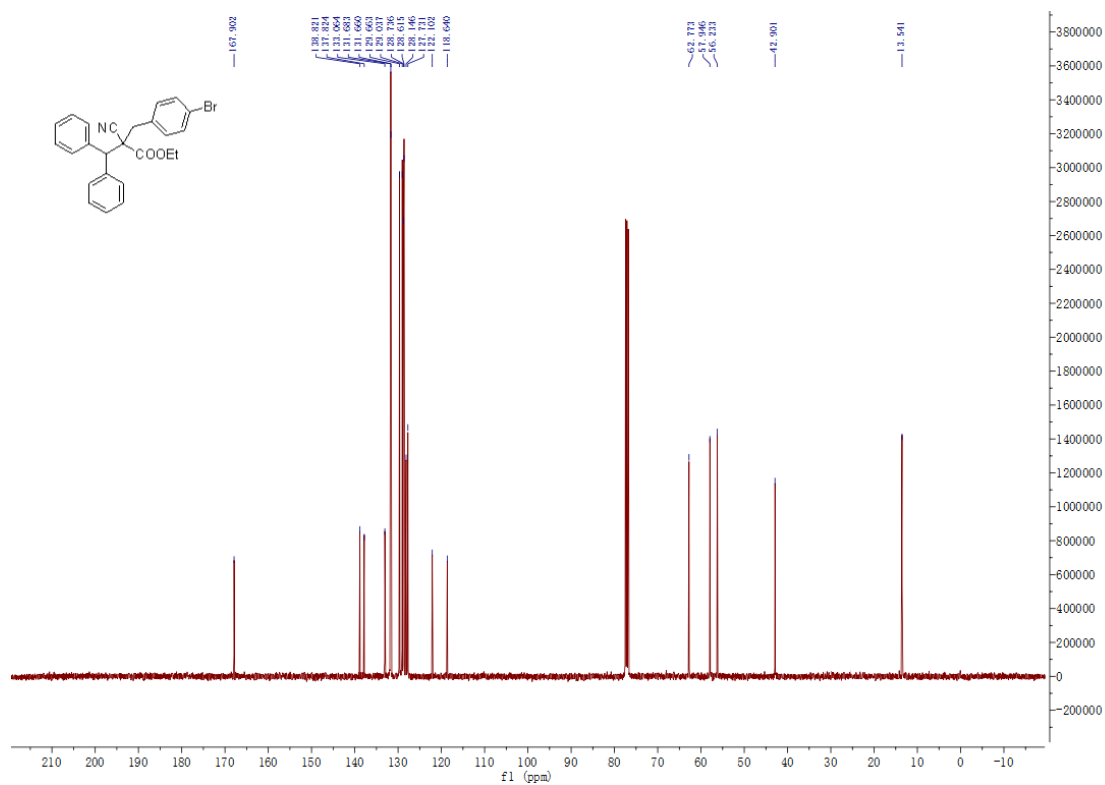

31

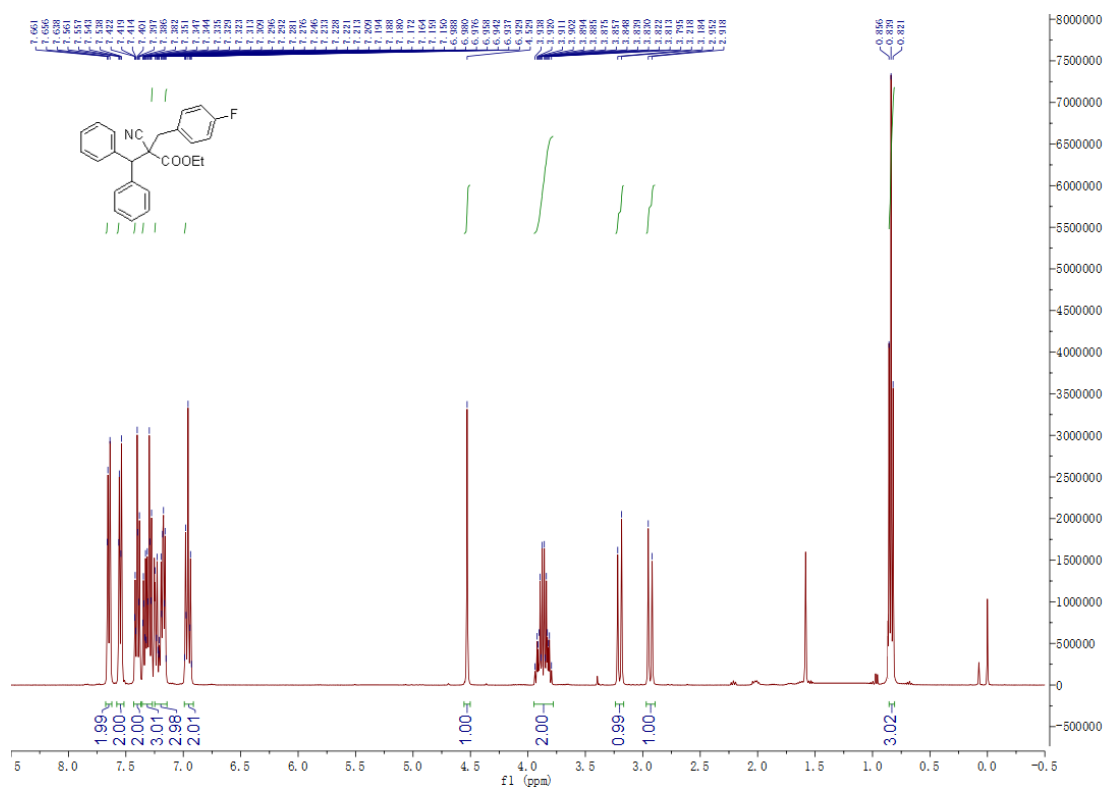

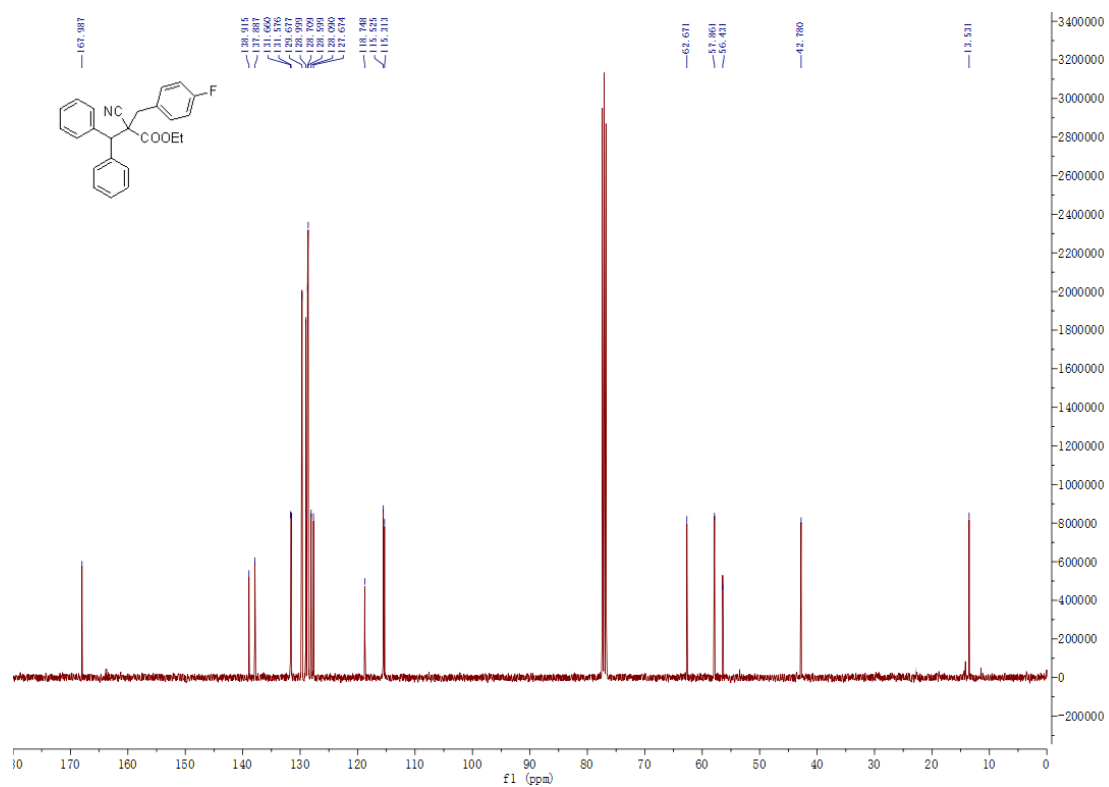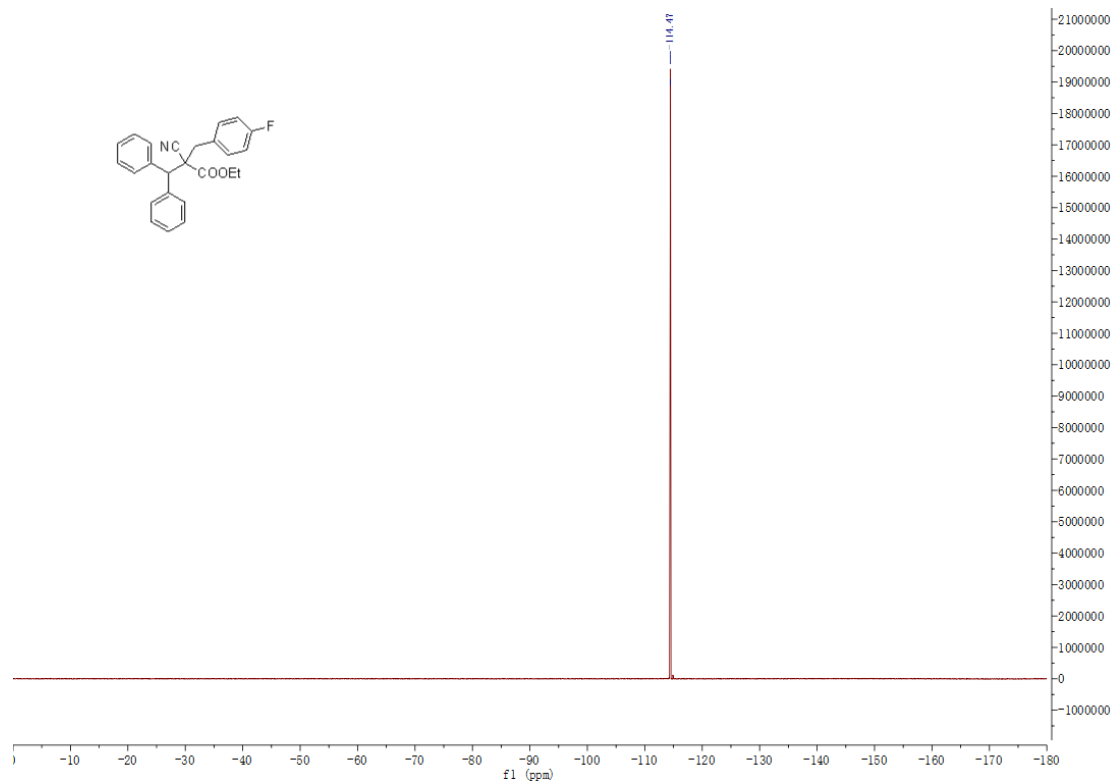

Chemical structure: CCOC(=O)C(CNc1ccccc1)C(c2ccccc2)c3ccccc3

<sup>1</sup>H NMR spectrum (CDCl<sub>3</sub>) showing peaks from 0 to 9 ppm. The x-axis is labeled f1 (ppm) and the y-axis is labeled intensity. The spectrum includes integration values for each peak group.

| Chemical Shift (ppm)                                                                                                                                                                                                                                                                                                                                                                                                                                                                                                                                                                                                                                                                                                                                                                                                                                                                                                                                                                                                                                                                                                                                                                     | Integration                                                                              |
|------------------------------------------------------------------------------------------------------------------------------------------------------------------------------------------------------------------------------------------------------------------------------------------------------------------------------------------------------------------------------------------------------------------------------------------------------------------------------------------------------------------------------------------------------------------------------------------------------------------------------------------------------------------------------------------------------------------------------------------------------------------------------------------------------------------------------------------------------------------------------------------------------------------------------------------------------------------------------------------------------------------------------------------------------------------------------------------------------------------------------------------------------------------------------------------|------------------------------------------------------------------------------------------|
| 7.61, 7.58, 7.54, 7.50, 7.46, 7.42, 7.38, 7.34, 7.30, 7.26, 7.22, 7.18, 7.14, 7.10, 7.06, 7.02, 6.98, 6.94, 6.90, 6.86, 6.82, 6.78, 6.74, 6.70, 6.66, 6.62, 6.58, 6.54, 6.50, 6.46, 6.42, 6.38, 6.34, 6.30, 6.26, 6.22, 6.18, 6.14, 6.10, 6.06, 6.02, 5.98, 5.94, 5.90, 5.86, 5.82, 5.78, 5.74, 5.70, 5.66, 5.62, 5.58, 5.54, 5.50, 5.46, 5.42, 5.38, 5.34, 5.30, 5.26, 5.22, 5.18, 5.14, 5.10, 5.06, 5.02, 4.98, 4.94, 4.90, 4.86, 4.82, 4.78, 4.74, 4.70, 4.66, 4.62, 4.58, 4.54, 4.50, 4.46, 4.42, 4.38, 4.34, 4.30, 4.26, 4.22, 4.18, 4.14, 4.10, 4.06, 4.02, 3.98, 3.94, 3.90, 3.86, 3.82, 3.78, 3.74, 3.70, 3.66, 3.62, 3.58, 3.54, 3.50, 3.46, 3.42, 3.38, 3.34, 3.30, 3.26, 3.22, 3.18, 3.14, 3.10, 3.06, 3.02, 2.98, 2.94, 2.90, 2.86, 2.82, 2.78, 2.74, 2.70, 2.66, 2.62, 2.58, 2.54, 2.50, 2.46, 2.42, 2.38, 2.34, 2.30, 2.26, 2.22, 2.18, 2.14, 2.10, 2.06, 2.02, 1.98, 1.94, 1.90, 1.86, 1.82, 1.78, 1.74, 1.70, 1.66, 1.62, 1.58, 1.54, 1.50, 1.46, 1.42, 1.38, 1.34, 1.30, 1.26, 1.22, 1.18, 1.14, 1.10, 1.06, 1.02, 0.98, 0.94, 0.90, 0.86, 0.82, 0.78, 0.74, 0.70, 0.66, 0.62, 0.58, 0.54, 0.50, 0.46, 0.42, 0.38, 0.34, 0.30, 0.26, 0.22, 0.18, 0.14, 0.10, 0.06, 0.02 | 2.01, 2.01, 2.00, 2.00, 3.00, 3.00, 0.99, 0.99, 4.02, 1.00, 2.02, 1.00, 0.99, 3.00, 3.01 |

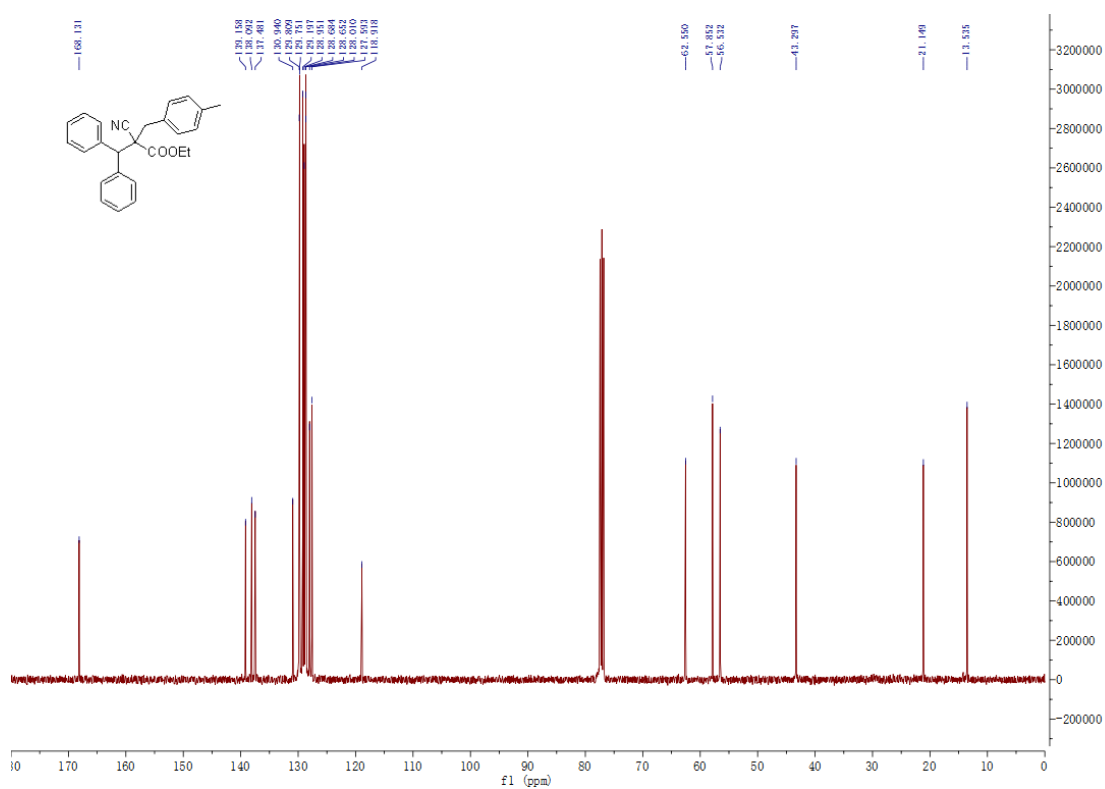



3n

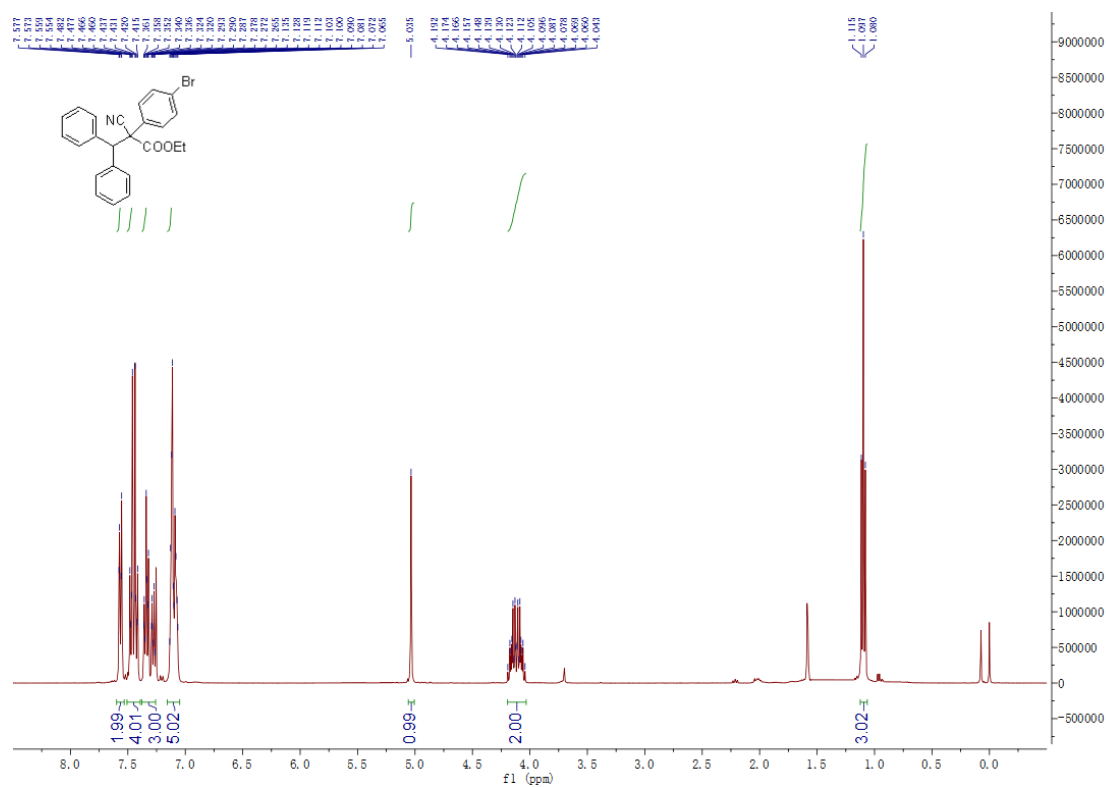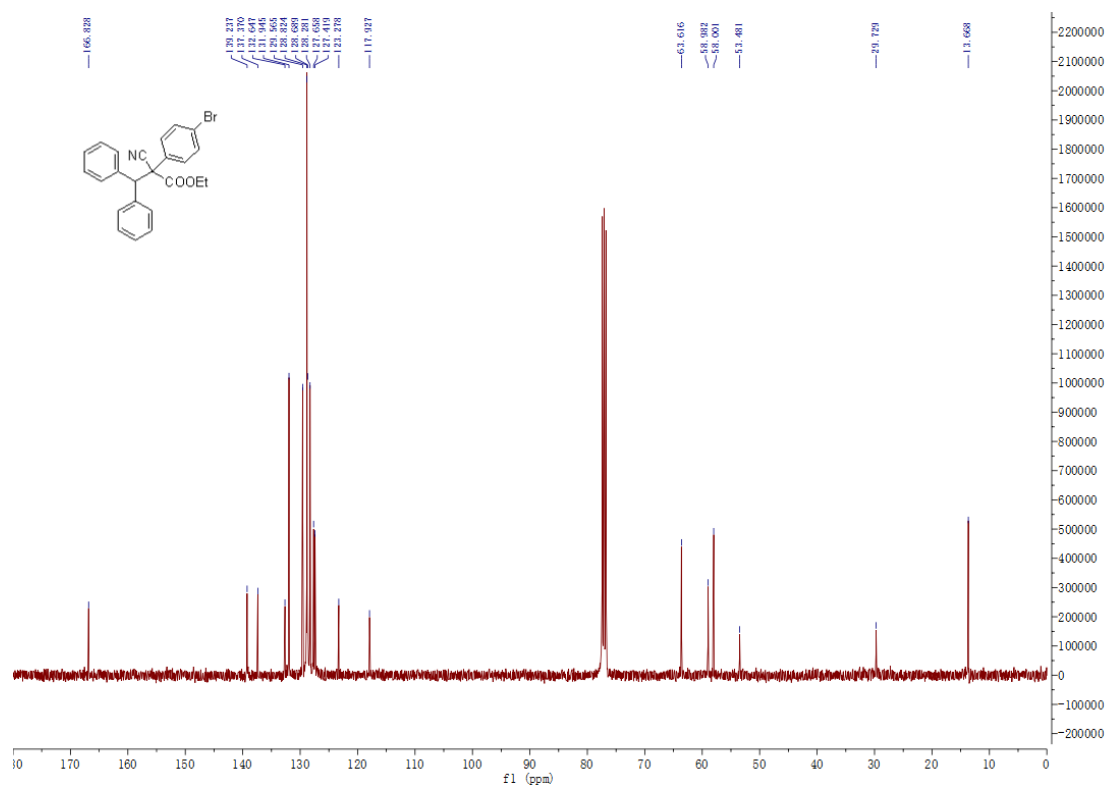

3o

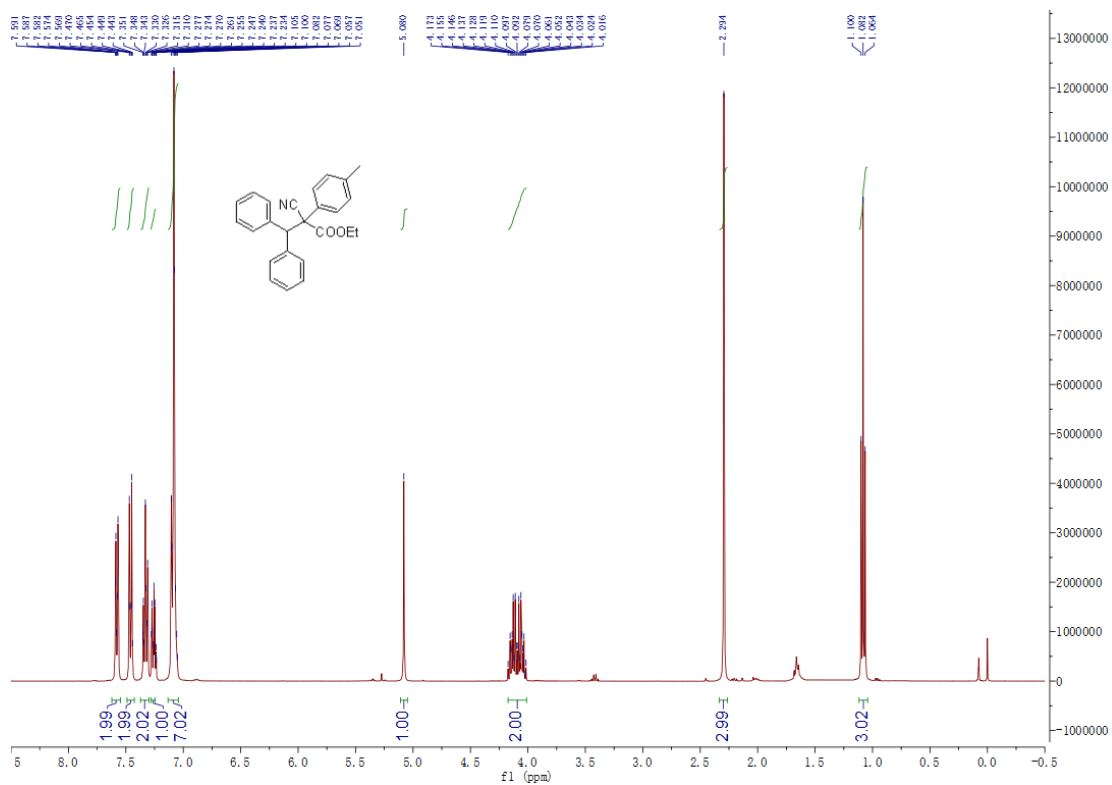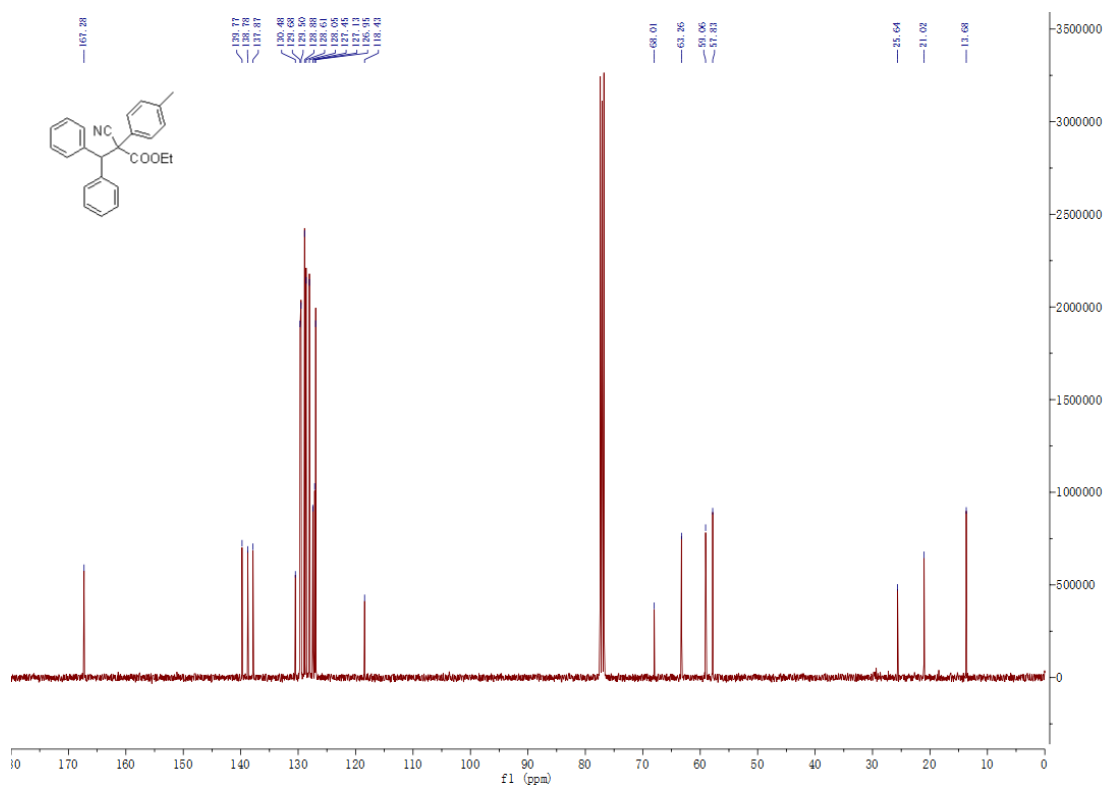

3p

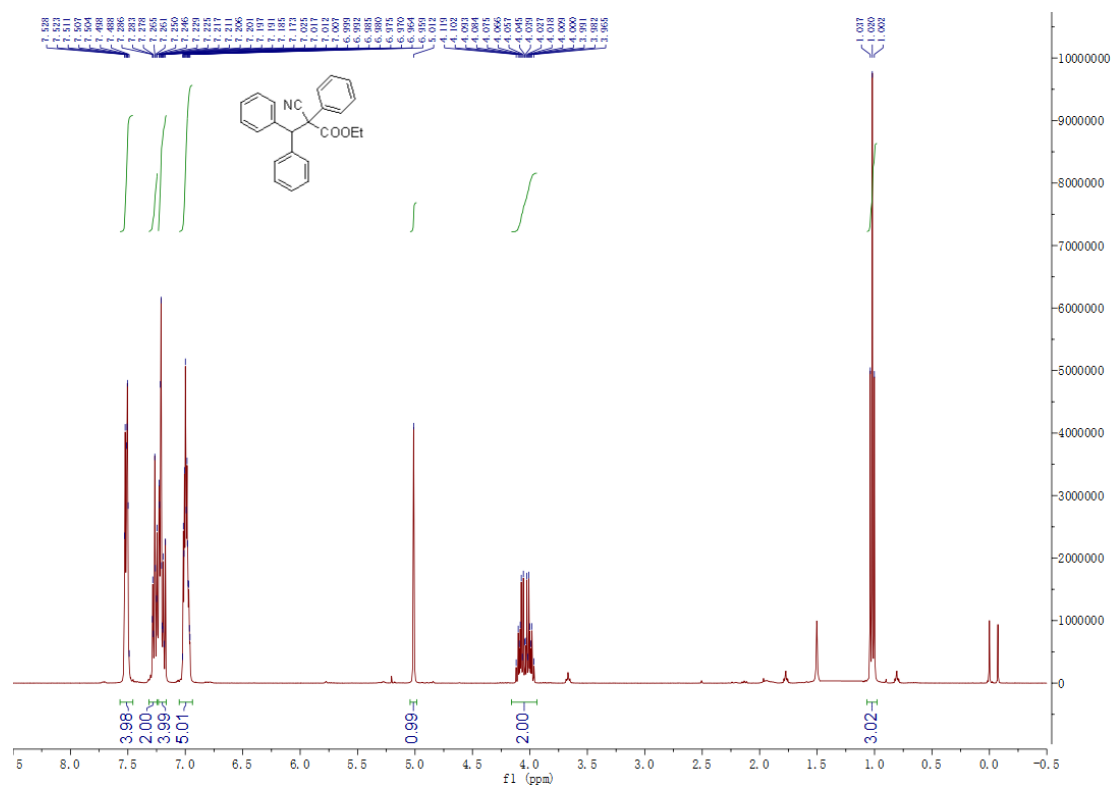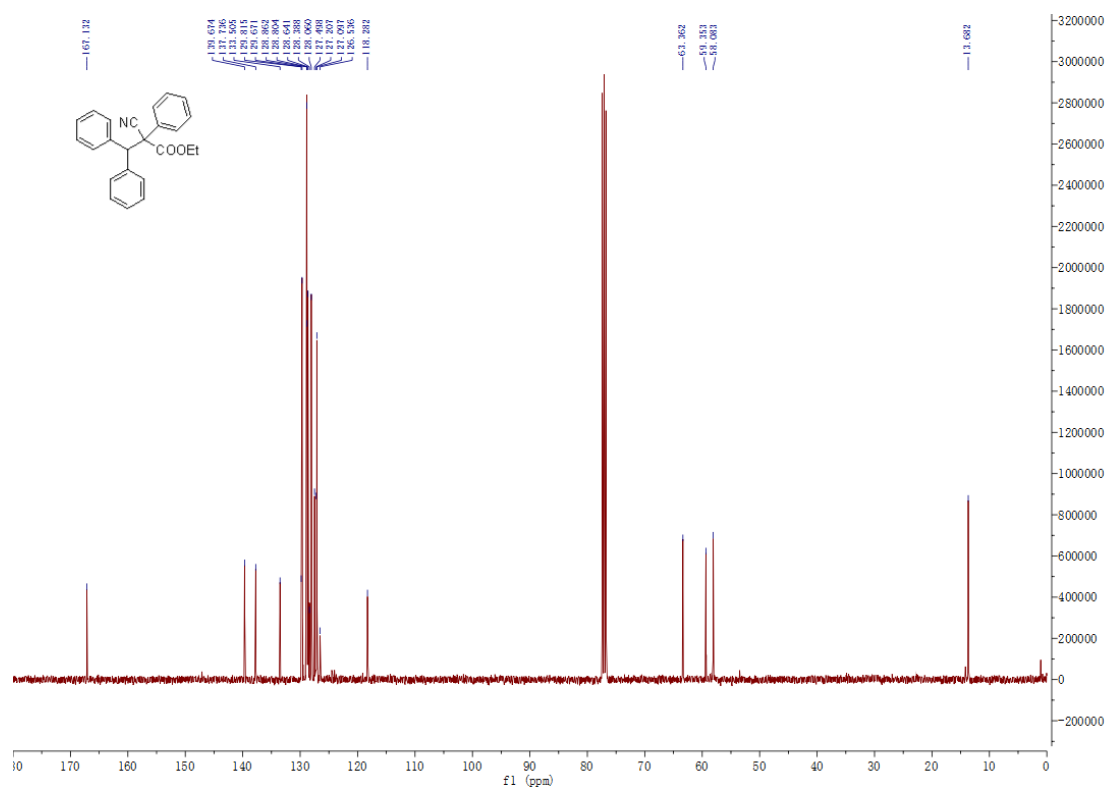

3q

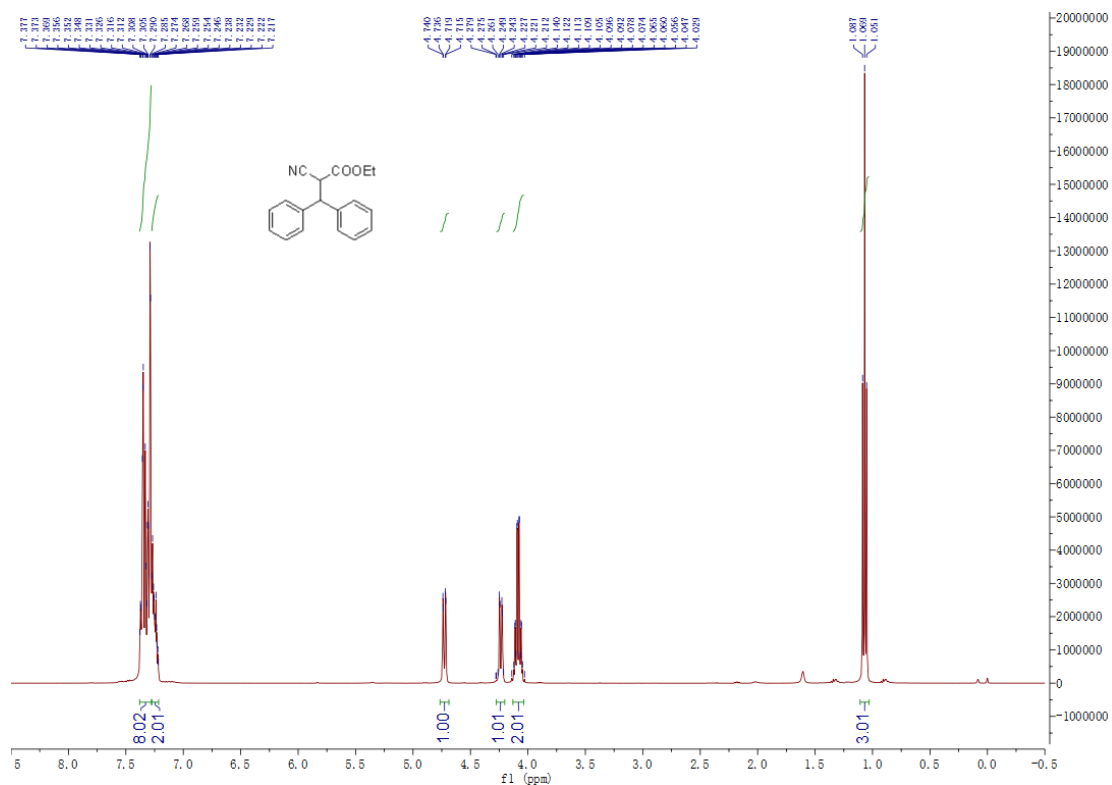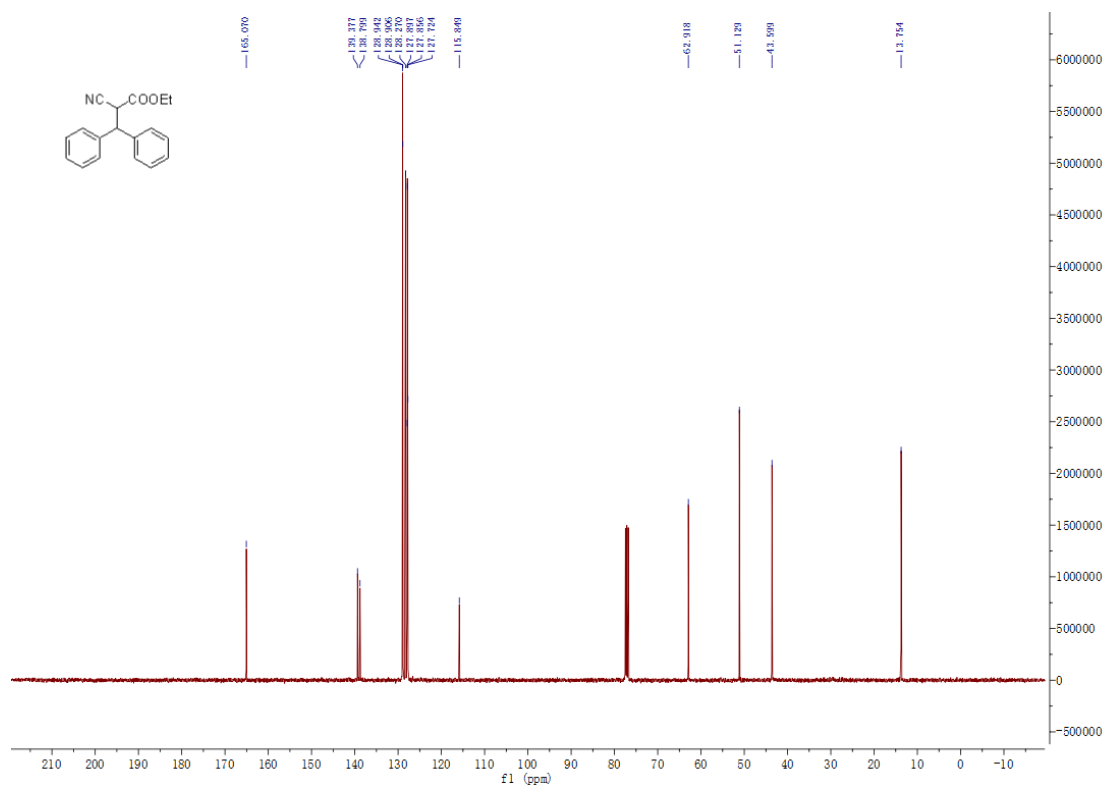

3r

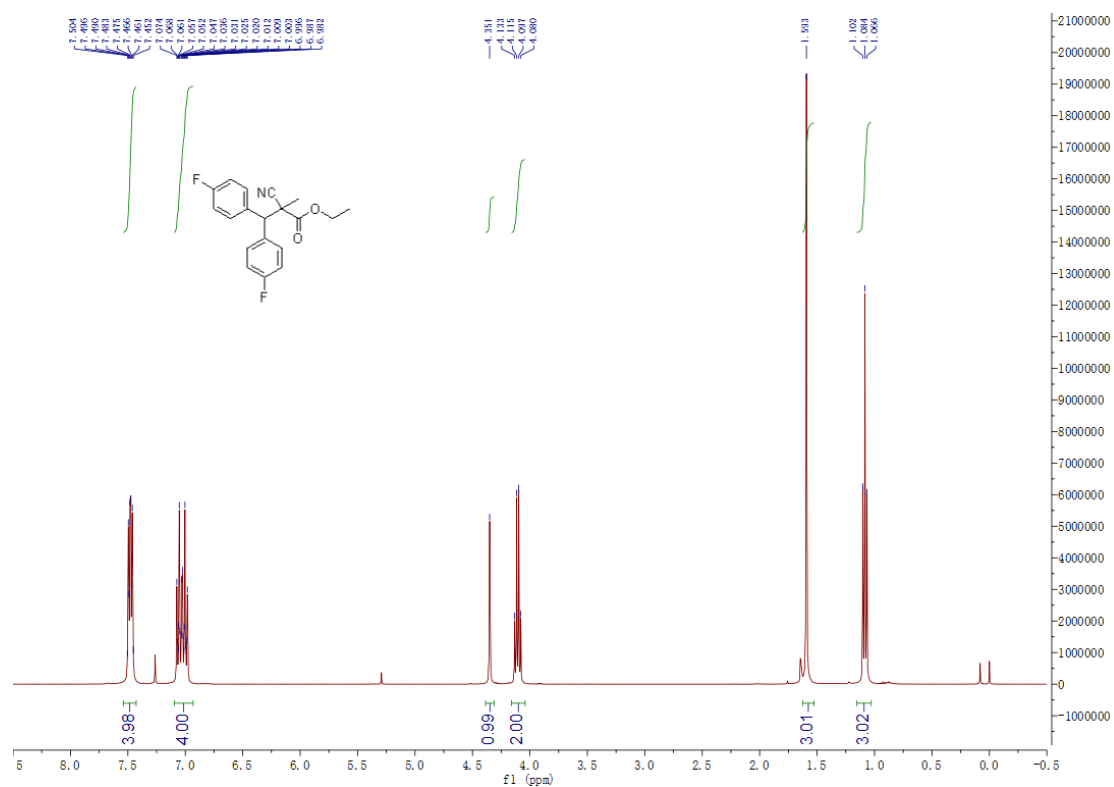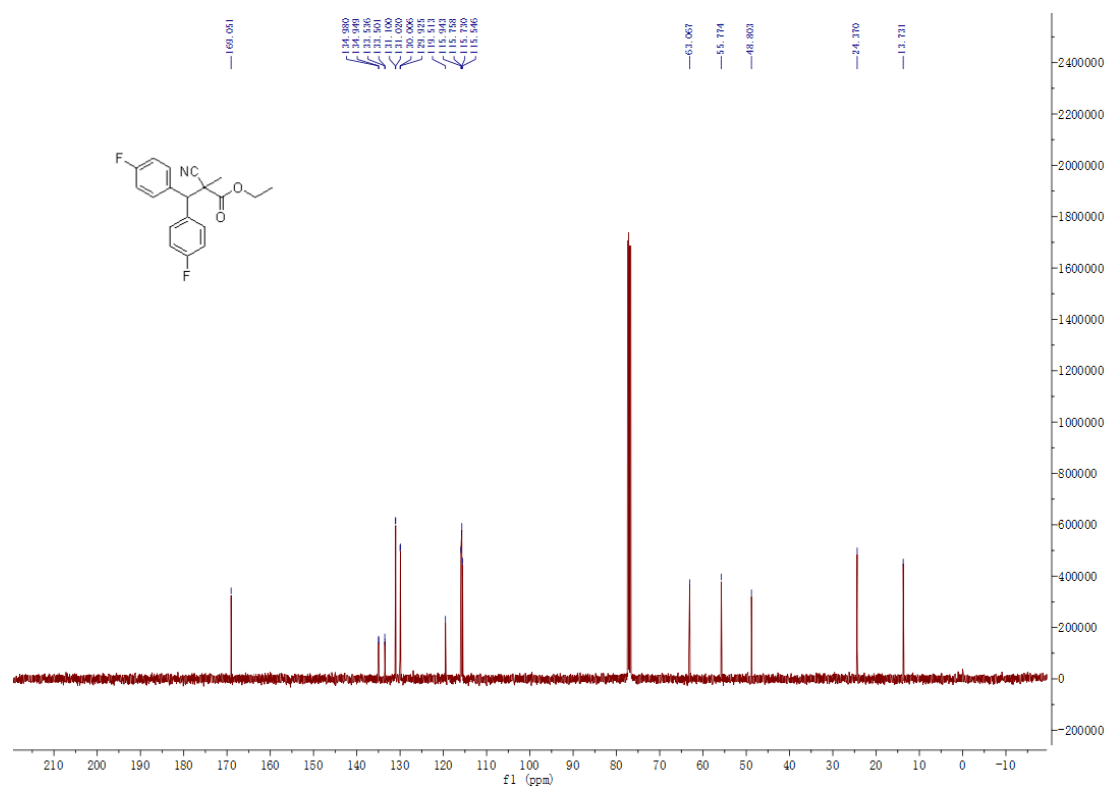

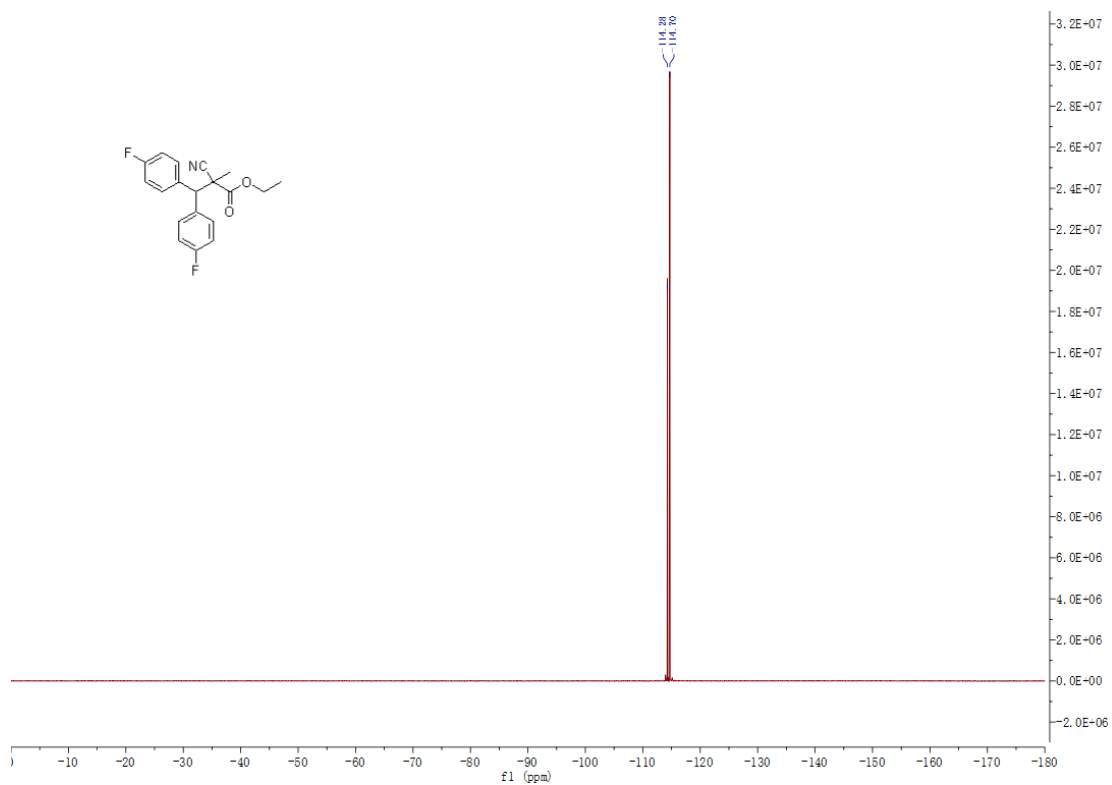

3s

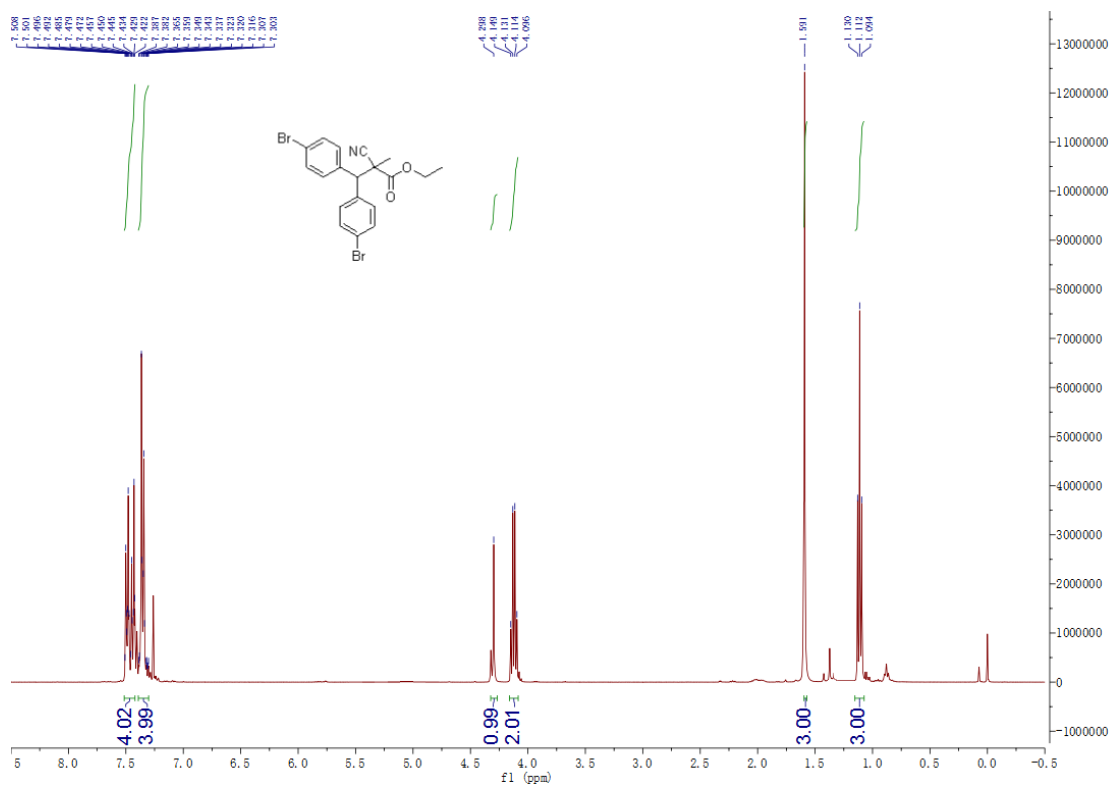

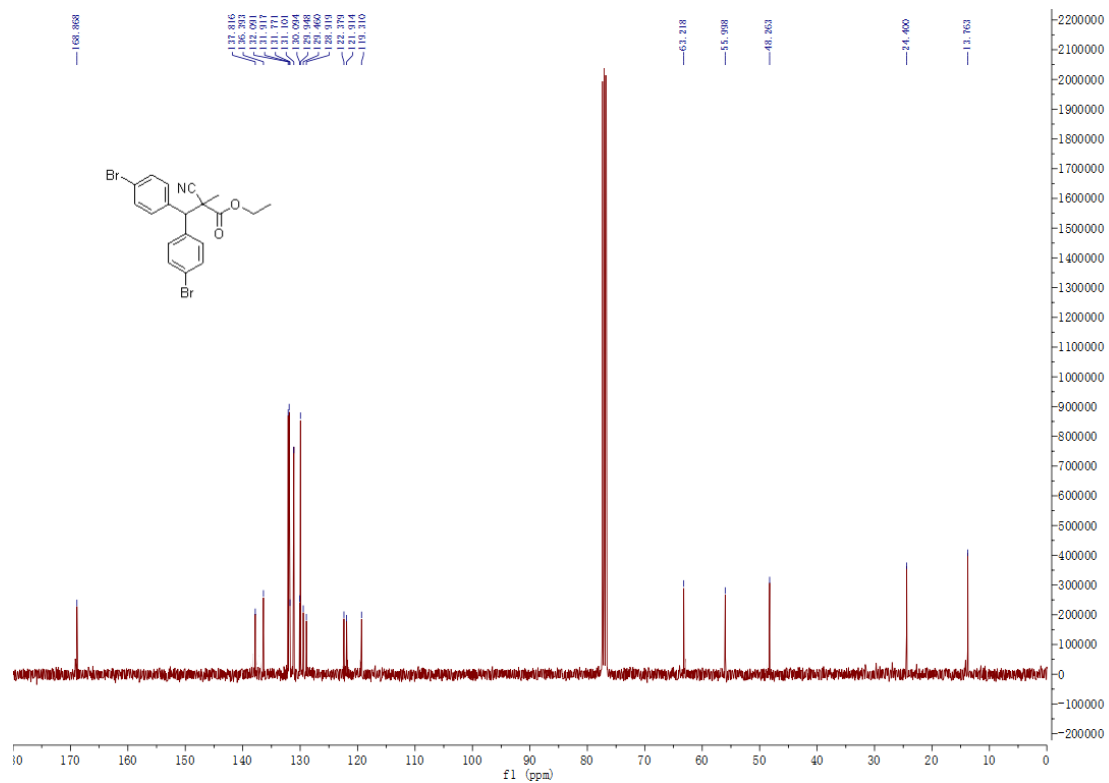

3t

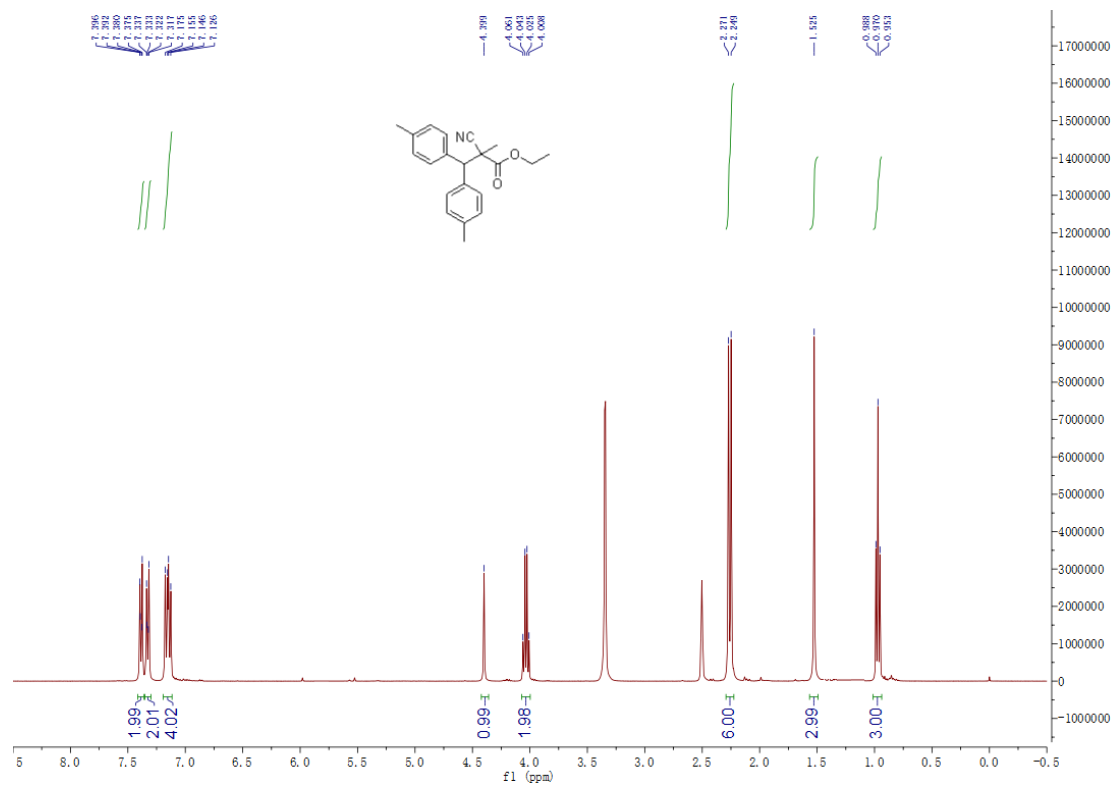

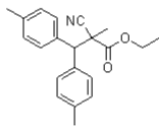

Chemical structure: CCOC(=O)C(C#N)(c1ccccc1)c2ccccc2

<sup>1</sup>H NMR spectrum (CDCl<sub>3</sub>) showing peaks from 0 to 8 ppm. The x-axis is labeled f1 (ppm) and the y-axis is labeled intensity. Integration values are shown below the peaks.

| Chemical Shift (ppm) | Integration |
|----------------------|-------------|
| 7.8-7.9              | 1.00        |
| 7.5-7.6              | 3.02        |
| 7.3-7.4              | 3.99        |
| 7.1-7.2              | 0.99        |
| 6.9-7.0              | 1.00        |
| 6.7-6.8              | 0.99        |
| 4.4                  | 0.98        |
| 4.1-4.2              | 2.00        |
| 2.3                  | 2.99        |
| 1.6                  | 3.00        |
| 1.1                  | 3.01        |



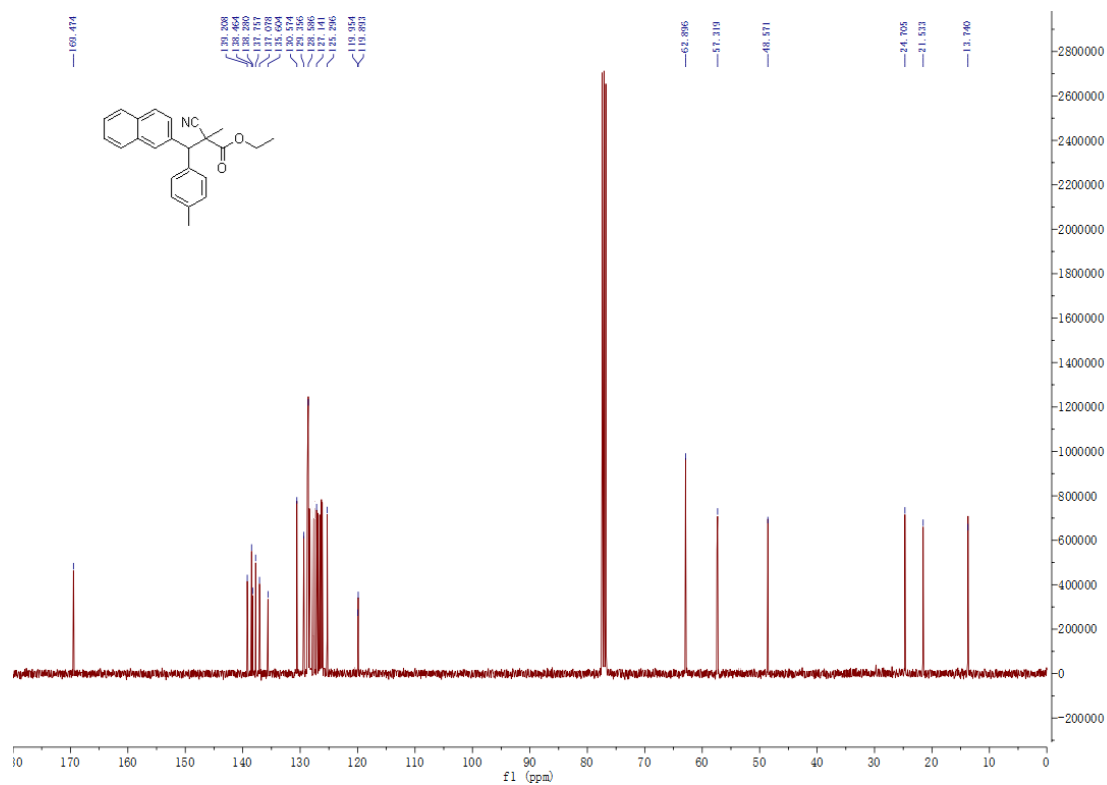

3v

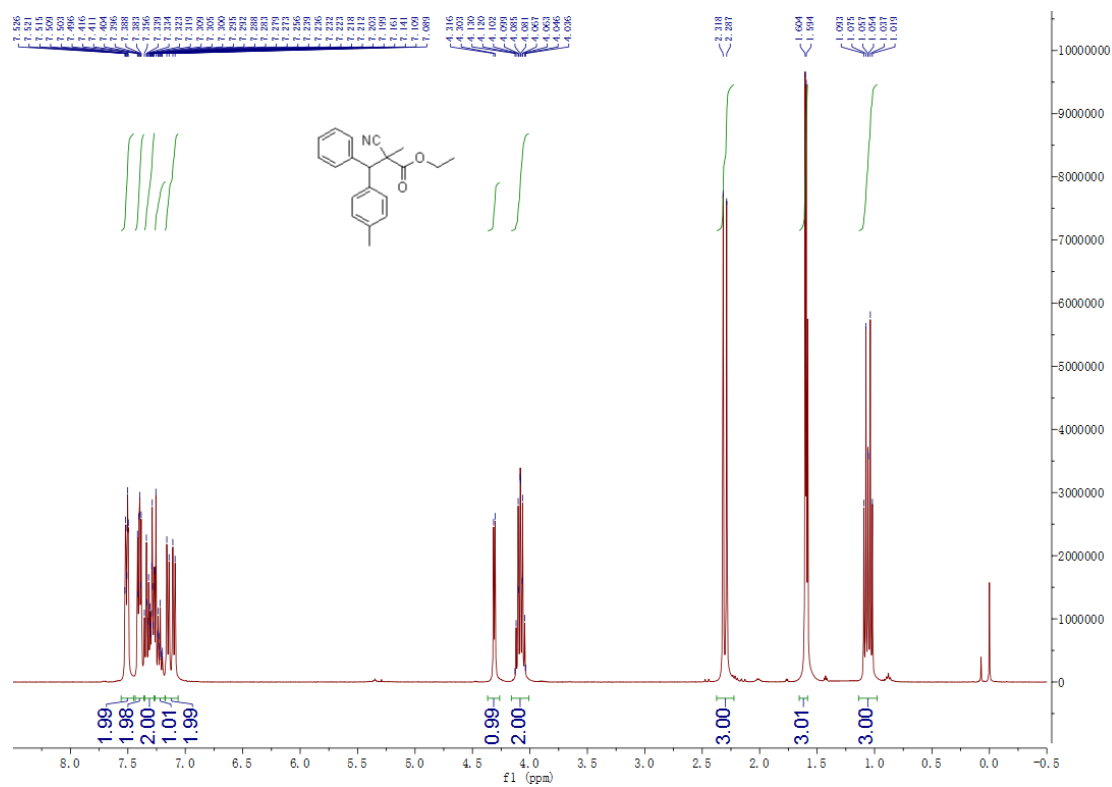

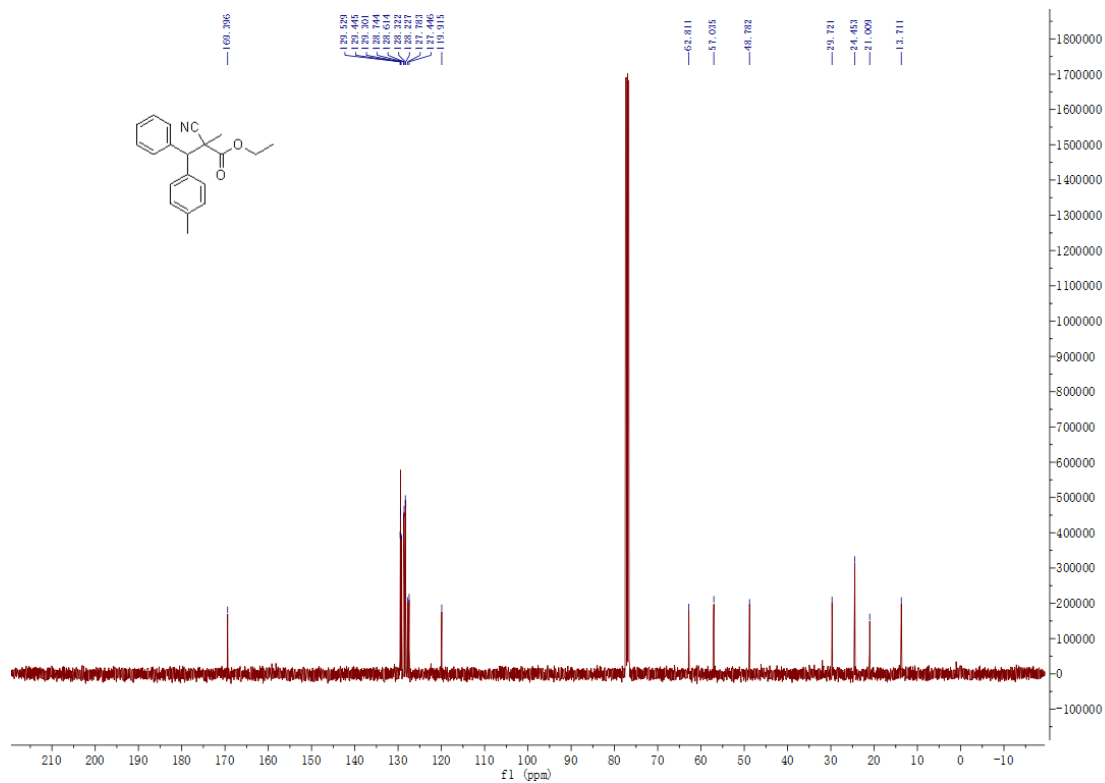

3w

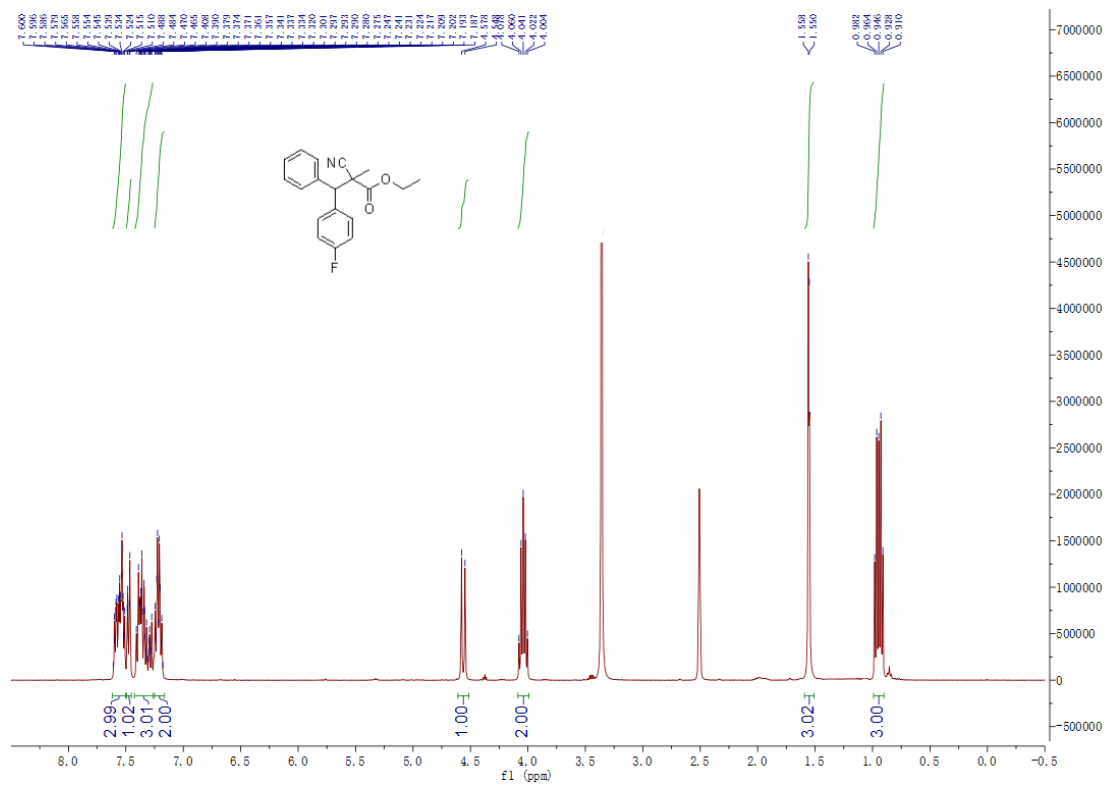

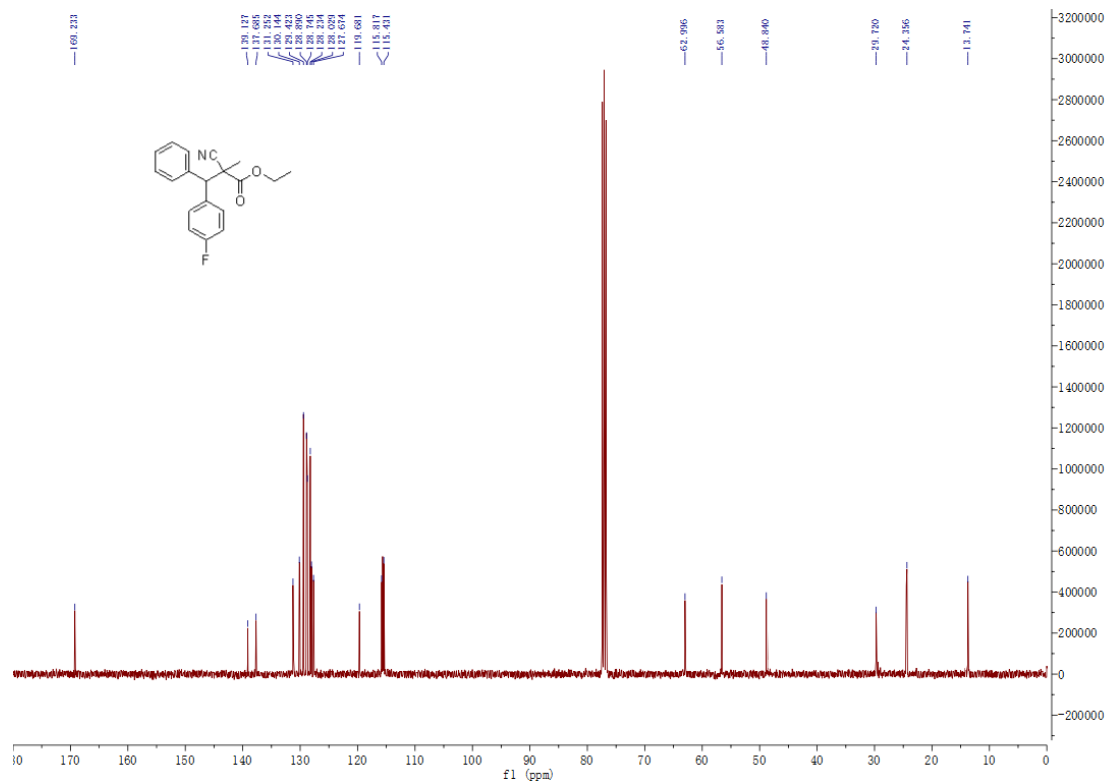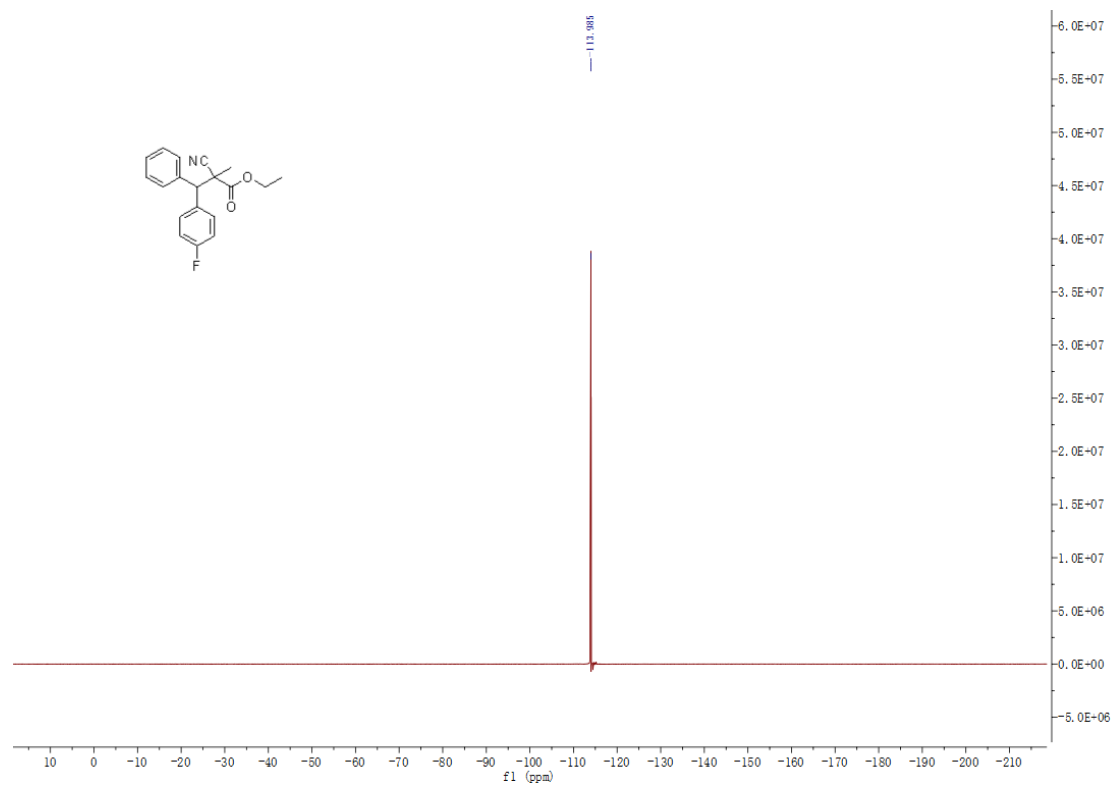

3x

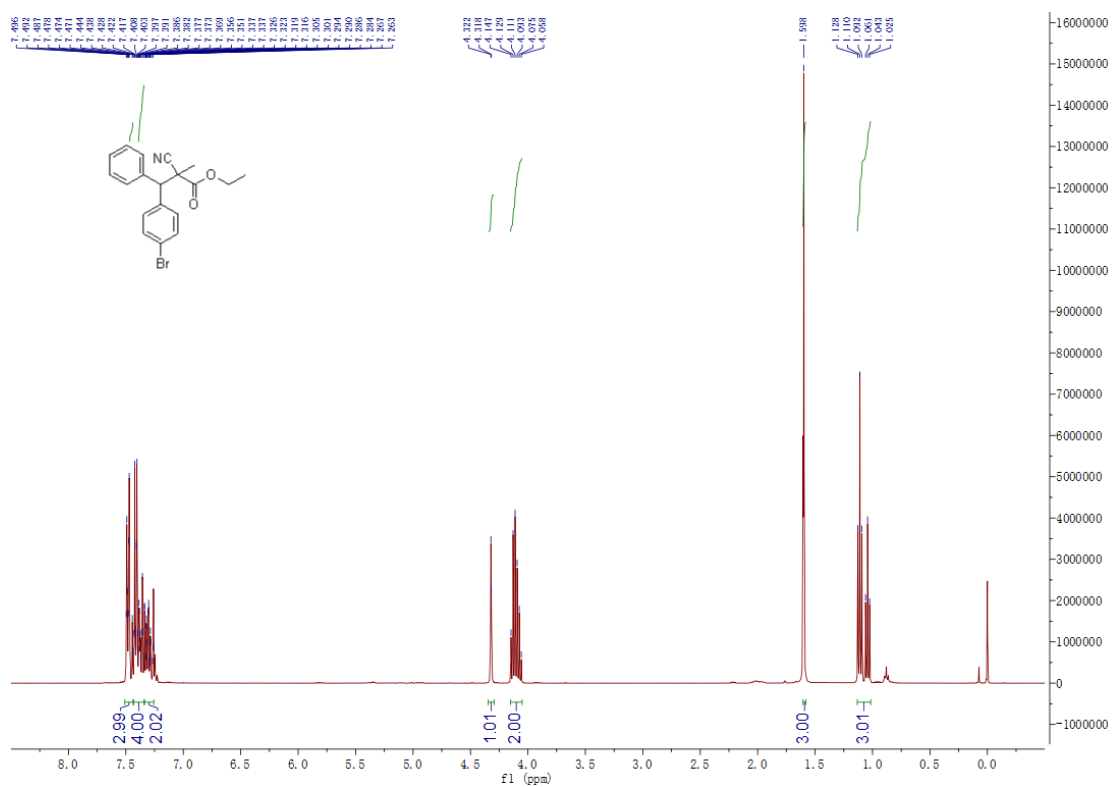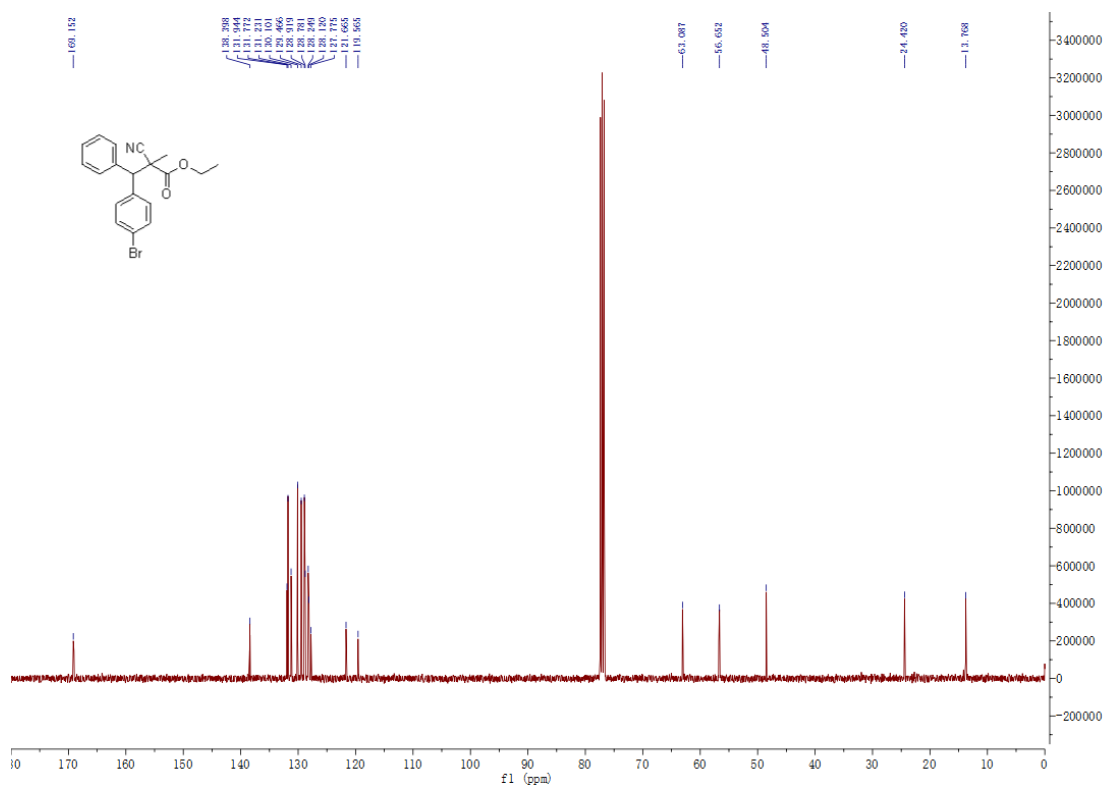

3y

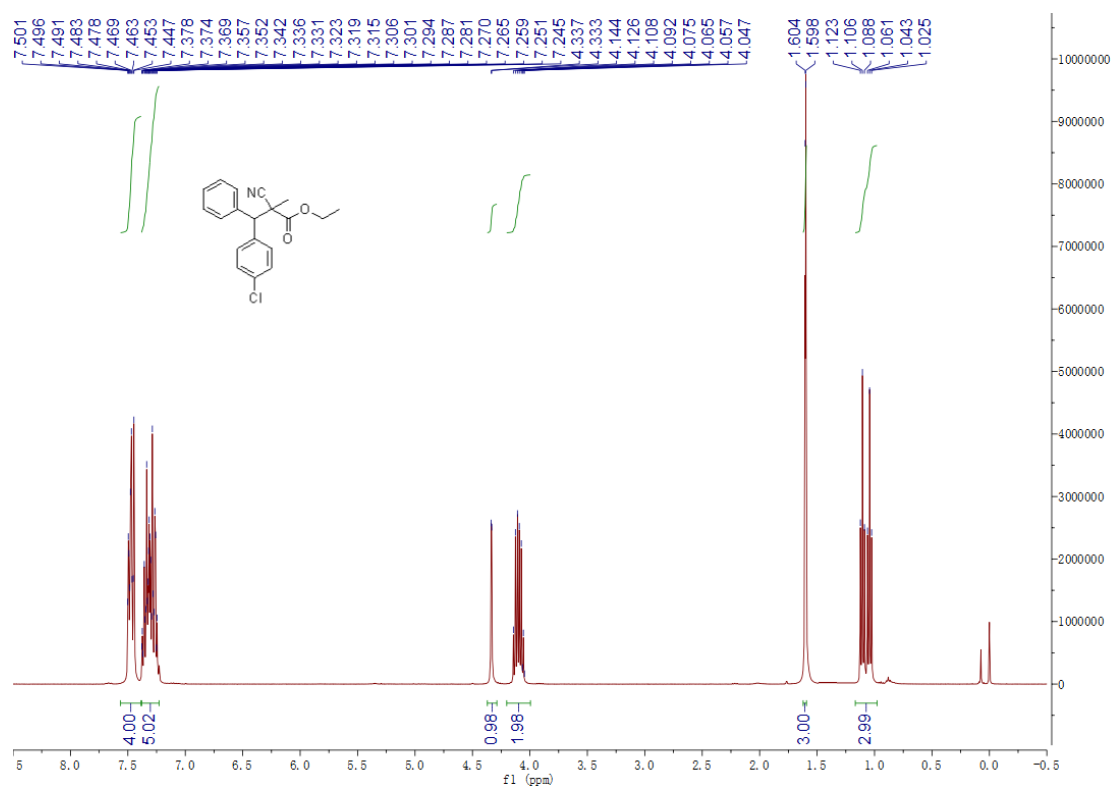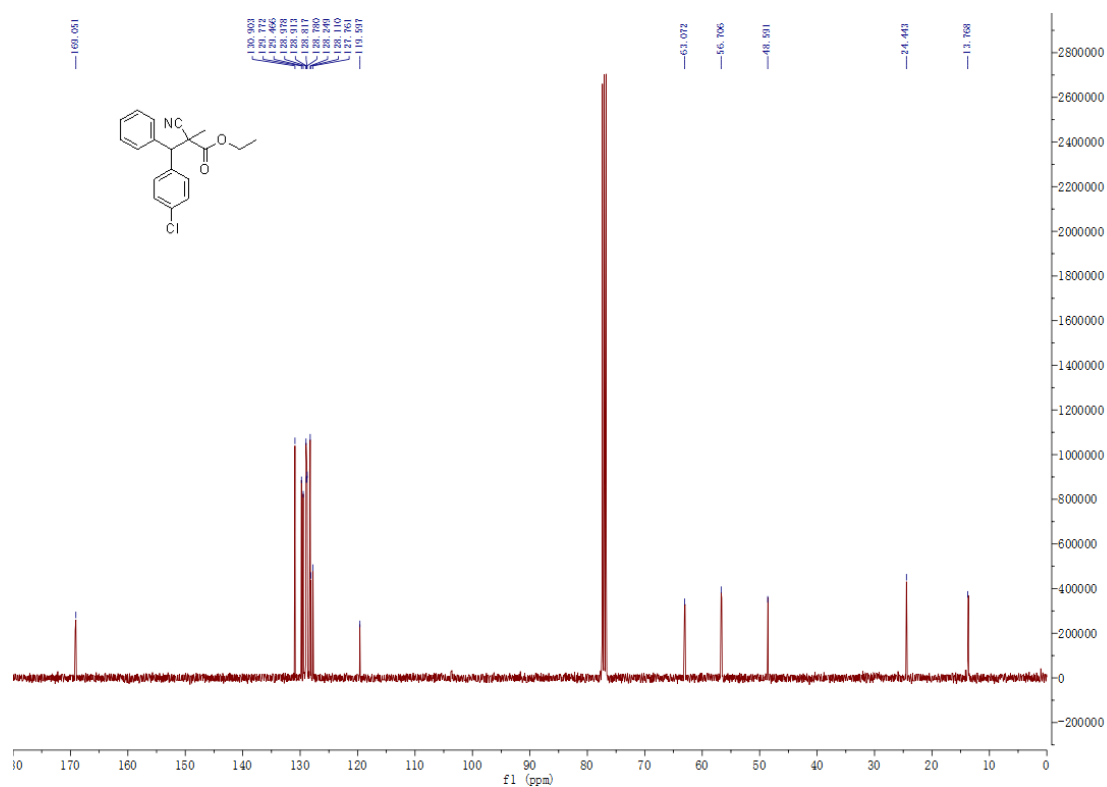

Chemical structure: CCOC(=O)c1ccc(cc1)C(=O)Nc2ccccc2C3=CC=CC=C3

<sup>1</sup>H NMR spectrum (CDCl<sub>3</sub>) showing peaks from 0 to 8 ppm. Integration values are shown below the peaks: 1.02, 3.00, 5.01, 3.02, 1.00, 2.01, 3.01, 3.02.

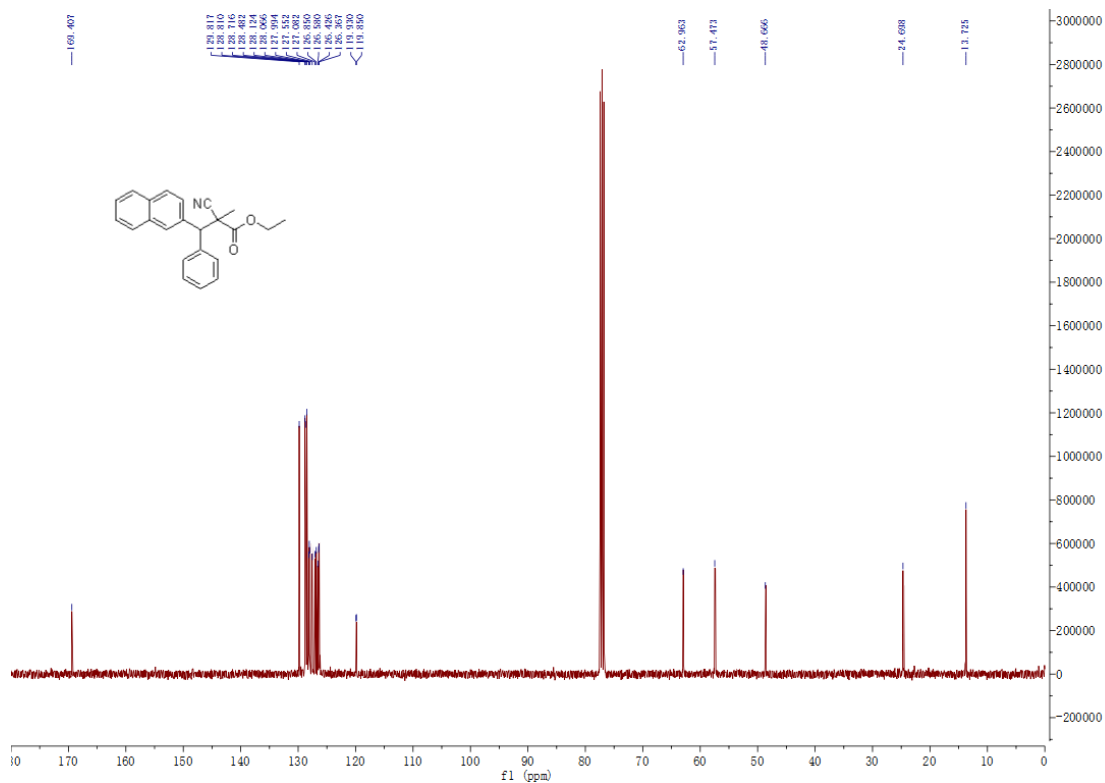

3aa

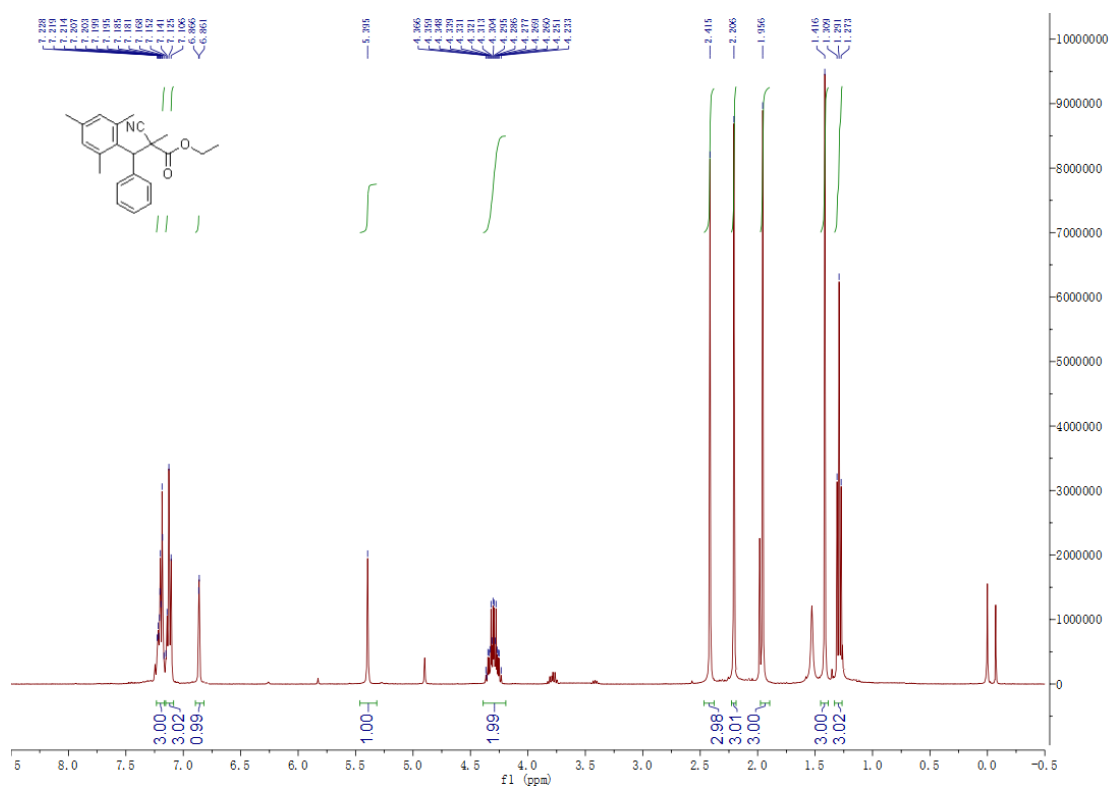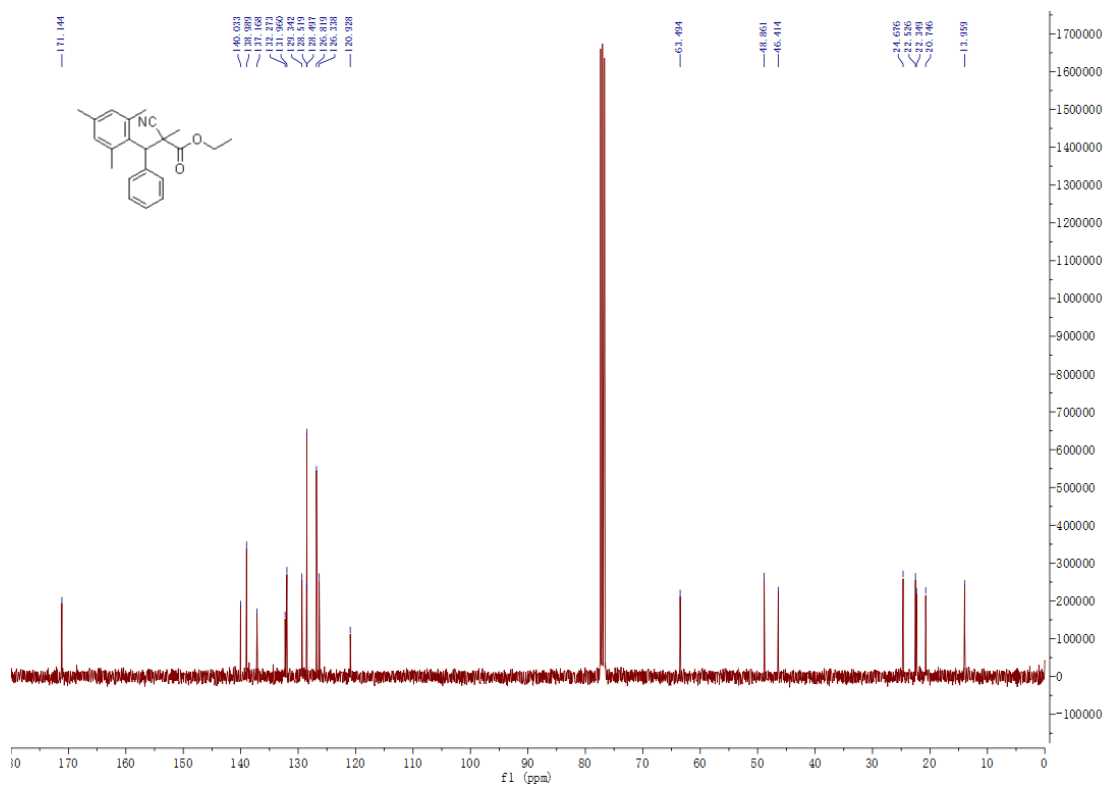

5a

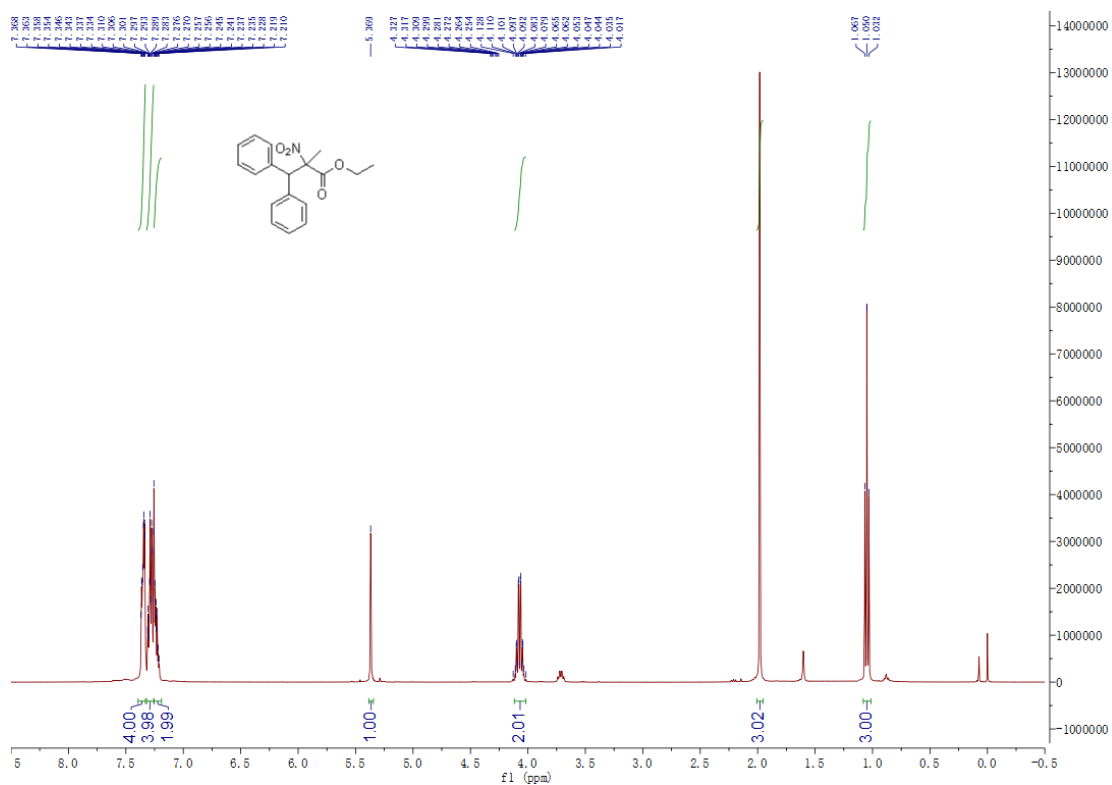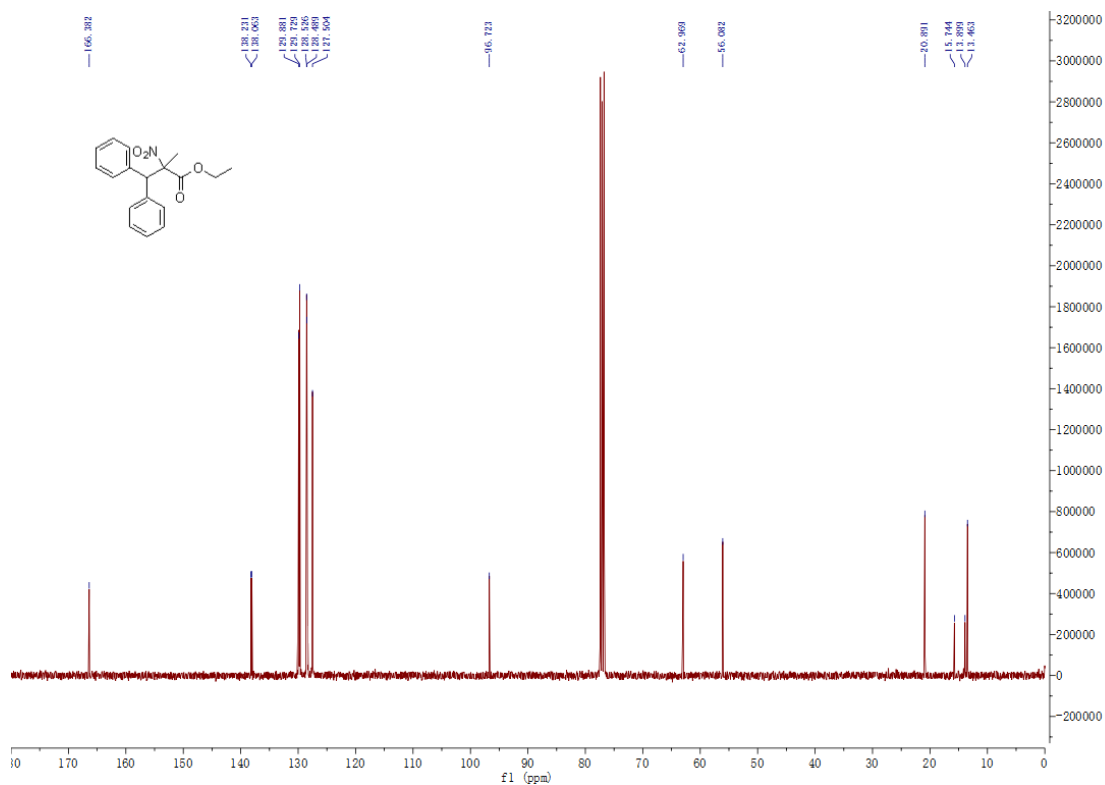



5b

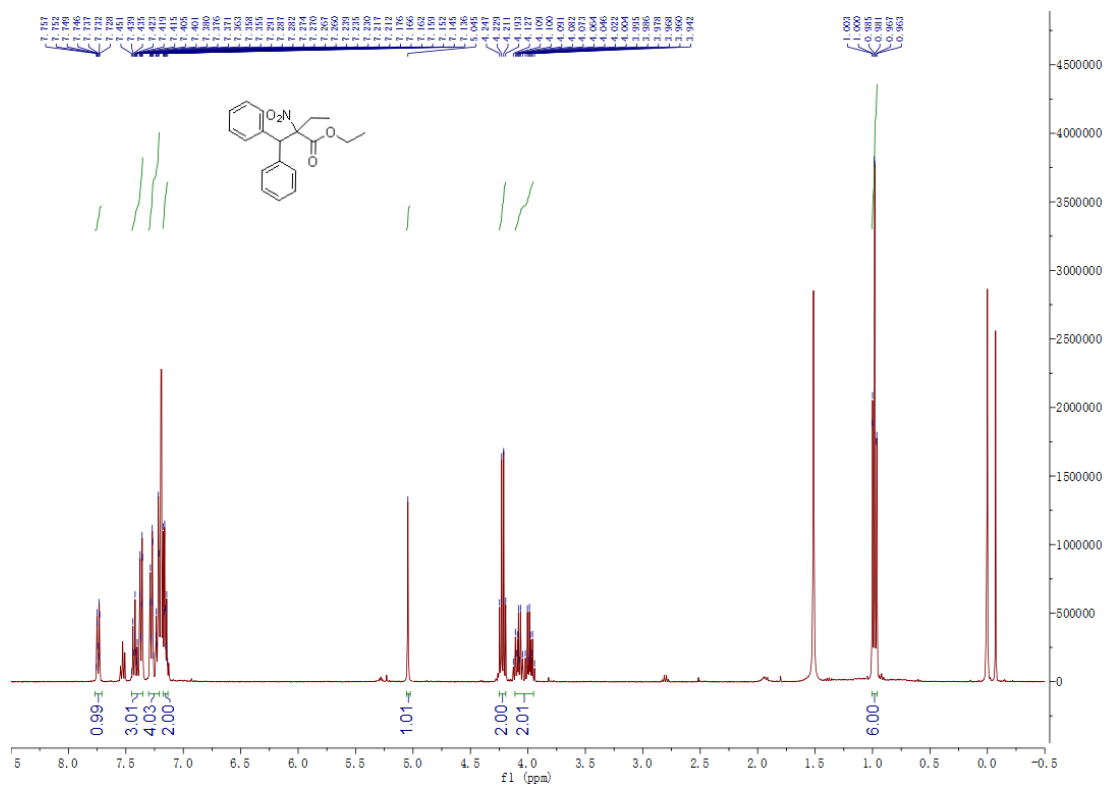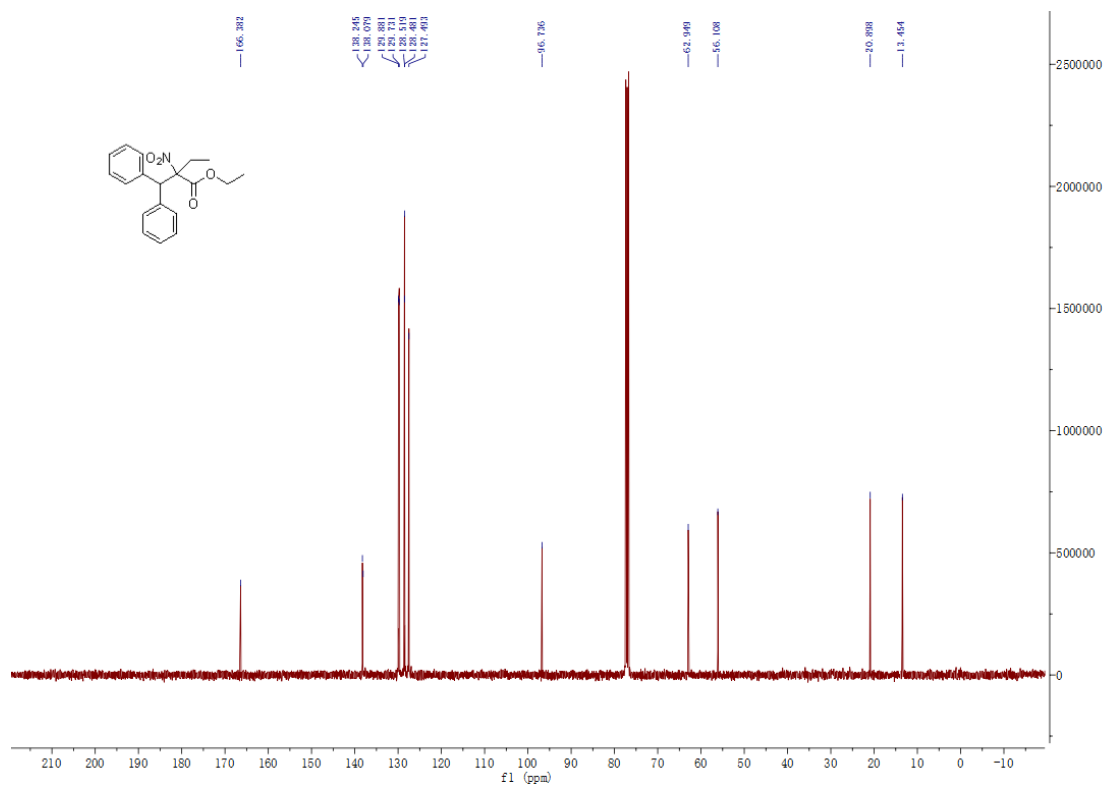

Chemical structure: CCOC(=O)C(c1ccccc1)C(=O)OCC

<sup>1</sup>H NMR spectrum (ppm):

- 7.96, 7.94, 7.92, 7.90, 7.88, 7.86, 7.84, 7.82, 7.80, 7.78, 7.76, 7.74, 7.72, 7.70, 7.68, 7.66, 7.64, 7.62, 7.60, 7.58, 7.56, 7.54, 7.52, 7.50, 7.48, 7.46, 7.44, 7.42, 7.40, 7.38, 7.36, 7.34, 7.32, 7.30, 7.28, 7.26, 7.24, 7.22, 7.20, 7.18, 7.16, 7.14, 7.12, 7.10, 7.08, 7.06, 7.04, 7.02, 7.00, 6.98, 6.96, 6.94, 6.92, 6.90, 6.88, 6.86, 6.84, 6.82, 6.80, 6.78, 6.76, 6.74, 6.72, 6.70, 6.68, 6.66, 6.64, 6.62, 6.60, 6.58, 6.56, 6.54, 6.52, 6.50, 6.48, 6.46, 6.44, 6.42, 6.40, 6.38, 6.36, 6.34, 6.32, 6.30, 6.28, 6.26, 6.24, 6.22, 6.20, 6.18, 6.16, 6.14, 6.12, 6.10, 6.08, 6.06, 6.04, 6.02, 6.00, 5.98, 5.96, 5.94, 5.92, 5.90, 5.88, 5.86, 5.84, 5.82, 5.80, 5.78, 5.76, 5.74, 5.72, 5.70, 5.68, 5.66, 5.64, 5.62, 5.60, 5.58, 5.56, 5.54, 5.52, 5.50, 5.48, 5.46, 5.44, 5.42, 5.40, 5.38, 5.36, 5.34, 5.32, 5.30, 5.28, 5.26, 5.24, 5.22, 5.20, 5.18, 5.16, 5.14, 5.12, 5.10, 5.08, 5.06, 5.04, 5.02, 5.00, 4.98, 4.96, 4.94, 4.92, 4.90, 4.88, 4.86, 4.84, 4.82, 4.80, 4.78, 4.76, 4.74, 4.72, 4.70, 4.68, 4.66, 4.64, 4.62, 4.60, 4.58, 4.56, 4.54, 4.52, 4.50, 4.48, 4.46, 4.44, 4.42, 4.40, 4.38, 4.36, 4.34, 4.32, 4.30, 4.28, 4.26, 4.24, 4.22, 4.20, 4.18, 4.16, 4.14, 4.12, 4.10, 4.08, 4.06, 4.04, 4.02, 4.00, 3.98, 3.96, 3.94, 3.92, 3.90, 3.88, 3.86, 3.84, 3.82, 3.80, 3.78, 3.76, 3.74, 3.72, 3.70, 3.68, 3.66, 3.64, 3.62, 3.60, 3.58, 3.56, 3.54, 3.52, 3.50, 3.48, 3.46, 3.44, 3.42, 3.40, 3.38, 3.36, 3.34, 3.32, 3.30, 3.28, 3.26, 3.24, 3.22, 3.20, 3.18, 3.16, 3.14, 3.12, 3.10, 3.08, 3.06, 3.04, 3.02, 3.00, 2.98, 2.96, 2.94, 2.92, 2.90, 2.88, 2.86, 2.84, 2.82, 2.80, 2.78, 2.76, 2.74, 2.72, 2.70, 2.68, 2.66, 2.64, 2.62, 2.60, 2.58, 2.56, 2.54, 2.52, 2.50, 2.48, 2.46, 2.44, 2.42, 2.40, 2.38, 2.36, 2.34, 2.32, 2.30, 2.28, 2.26, 2.24, 2.22, 2.20, 2.18, 2.16, 2.14, 2.12, 2.10, 2.08, 2.06, 2.04, 2.02, 2.00, 1.98, 1.96, 1.94, 1.92, 1.90, 1.88, 1.86, 1.84, 1.82, 1.80, 1.78, 1.76, 1.74, 1.72, 1.70, 1.68, 1.66, 1.64, 1.62, 1.60, 1.58, 1.56, 1.54, 1.52, 1.50, 1.48, 1.46, 1.44, 1.42, 1.40, 1.38, 1.36, 1.34, 1.32, 1.30, 1.28, 1.26, 1.24, 1.22, 1.20, 1.18, 1.16, 1.14, 1.12, 1.10, 1.08, 1.06, 1.04, 1.02, 1.00, 0.98, 0.96, 0.94, 0.92, 0.90, 0.88, 0.86, 0.84, 0.82, 0.80, 0.78, 0.76, 0.74, 0.72, 0.70, 0.68, 0.66, 0.64, 0.62, 0.60, 0.58, 0.56, 0.54, 0.52, 0.50, 0.48, 0.46, 0.44, 0.42, 0.40, 0.38, 0.36, 0.34, 0.32, 0.30, 0.28, 0.26, 0.24, 0.22, 0.20, 0.18, 0.16, 0.14, 0.12, 0.10, 0.08, 0.06, 0.04, 0.02, 0.00.

Integration values: 2.00, 1.99, 3.99, 2.01, 3.98, 1.00, 1.00, 1.98, 3.01.

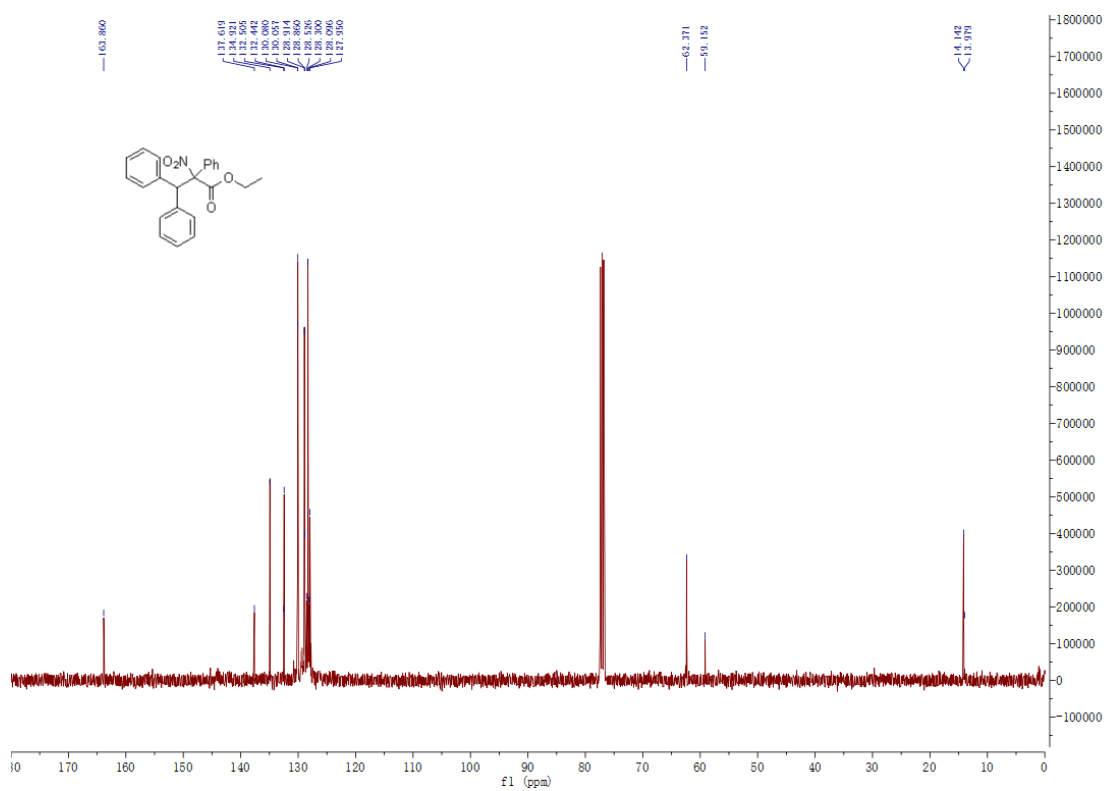

7a

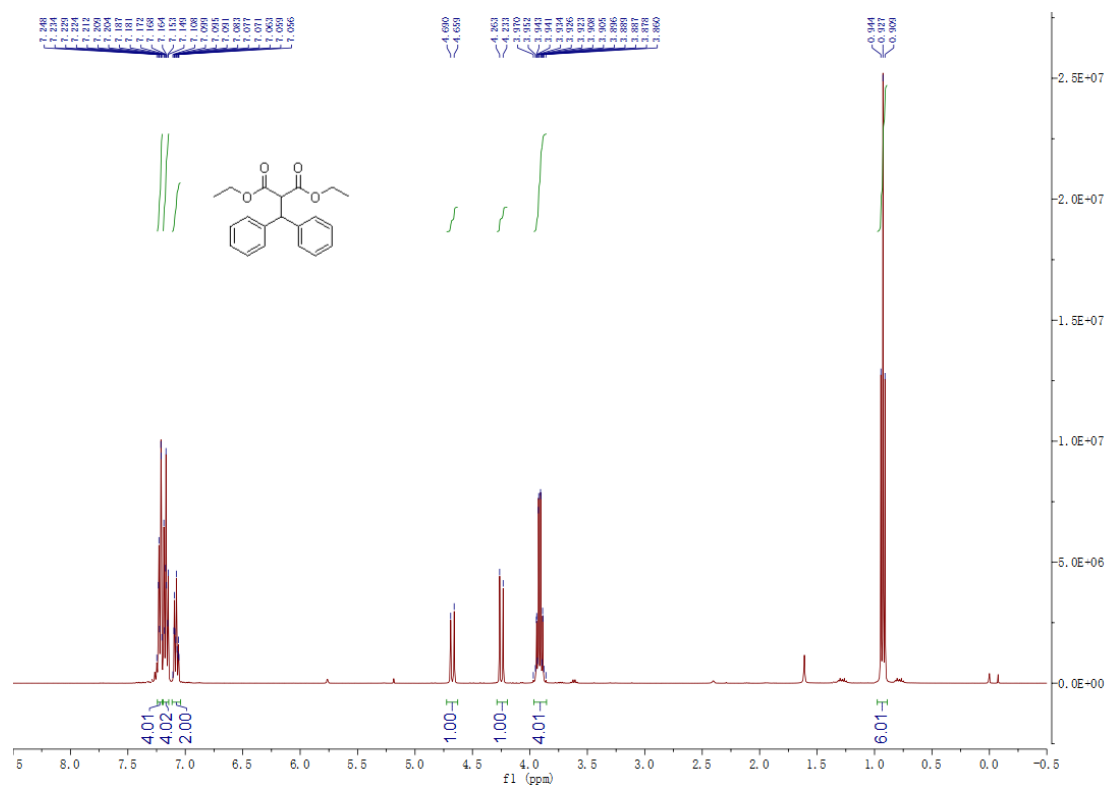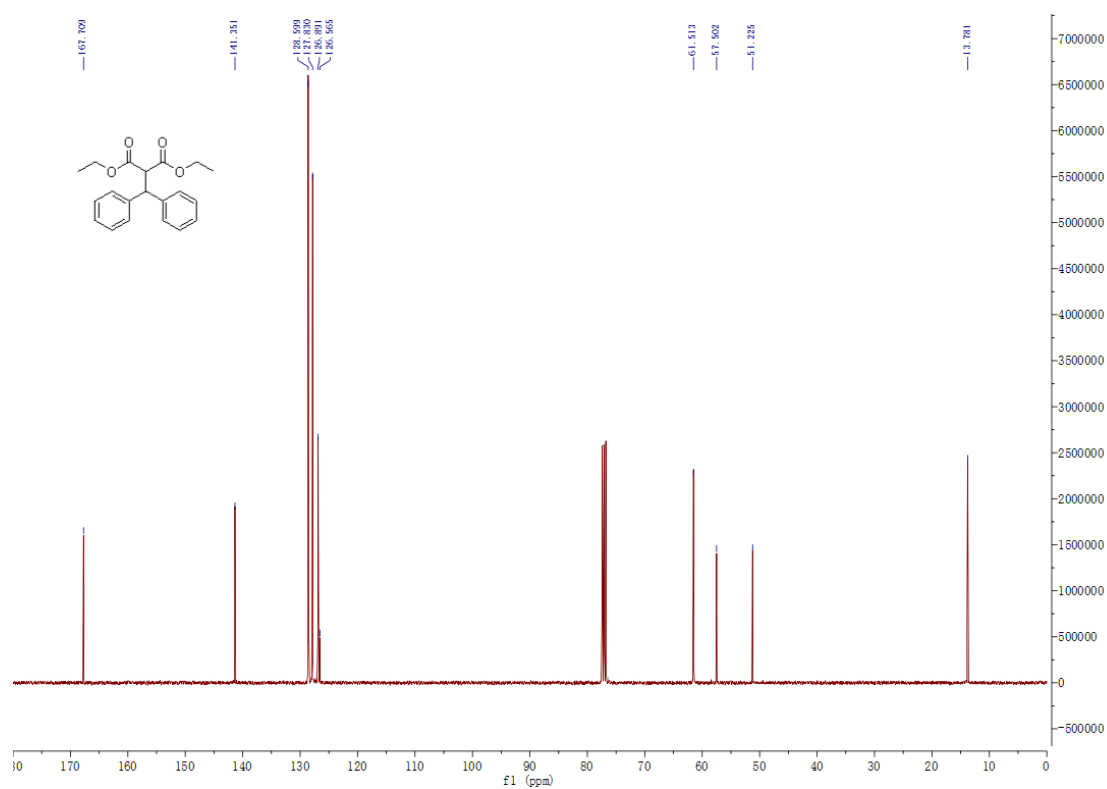

7c

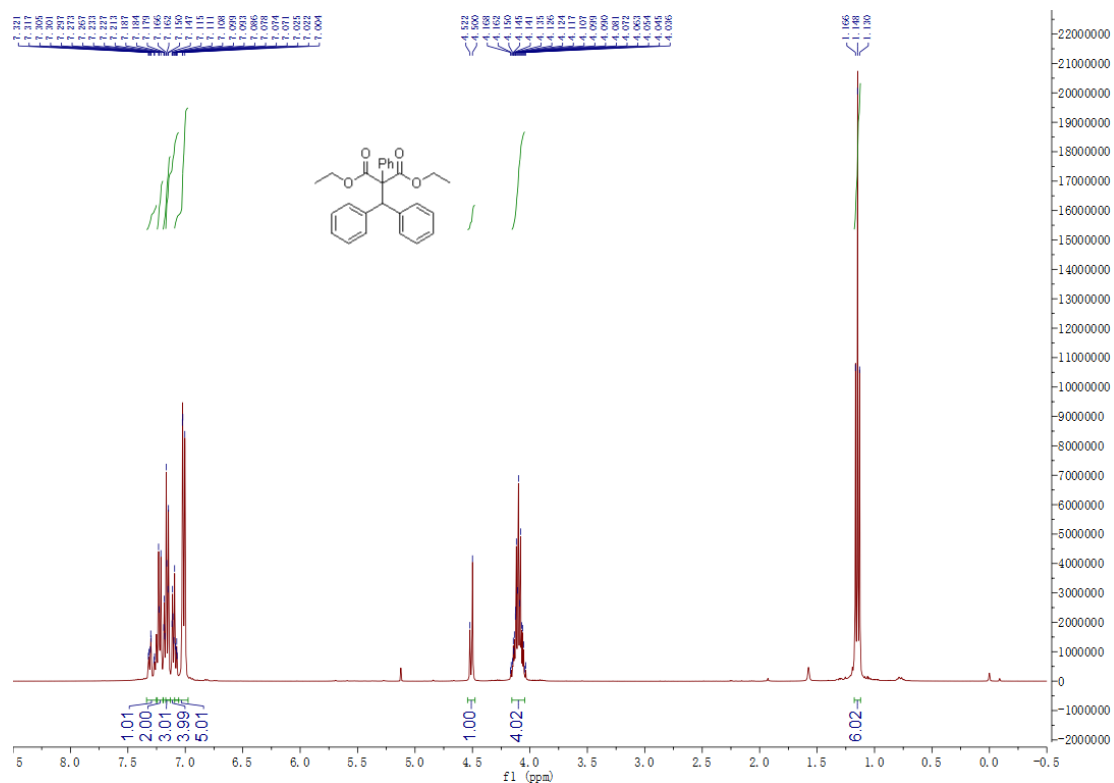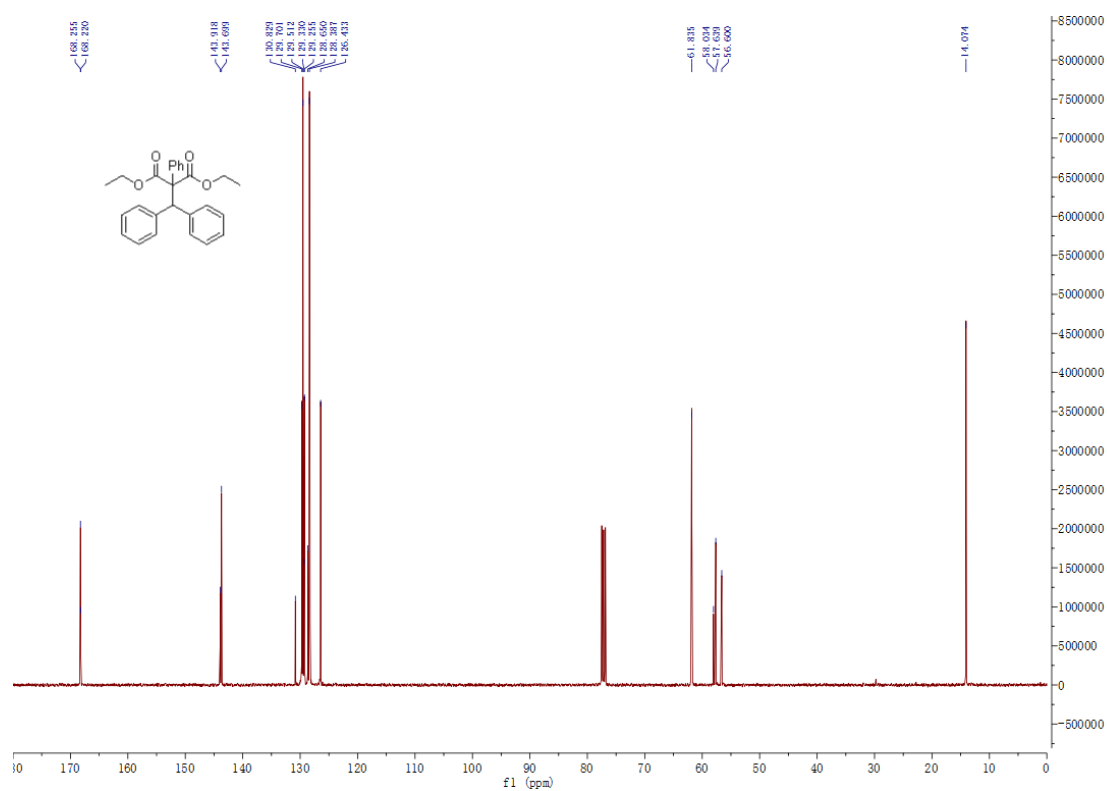

Chemical structure: N#CC(c1ccccc1)C(c2ccccc2)C#N

<sup>1</sup>H NMR spectrum (DMSO-d<sub>6</sub>) showing peaks at approximately 7.3 ppm (aromatic protons, integral 4.98), 4.5 ppm (methine protons, integral 1.00), and 4.2 ppm (methylene protons, integral 0.99). The x-axis is labeled f1 (ppm) and ranges from 0.0 to 8.0. The y-axis represents intensity, ranging from -1,000,000 to 14,000,000.

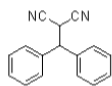

9b

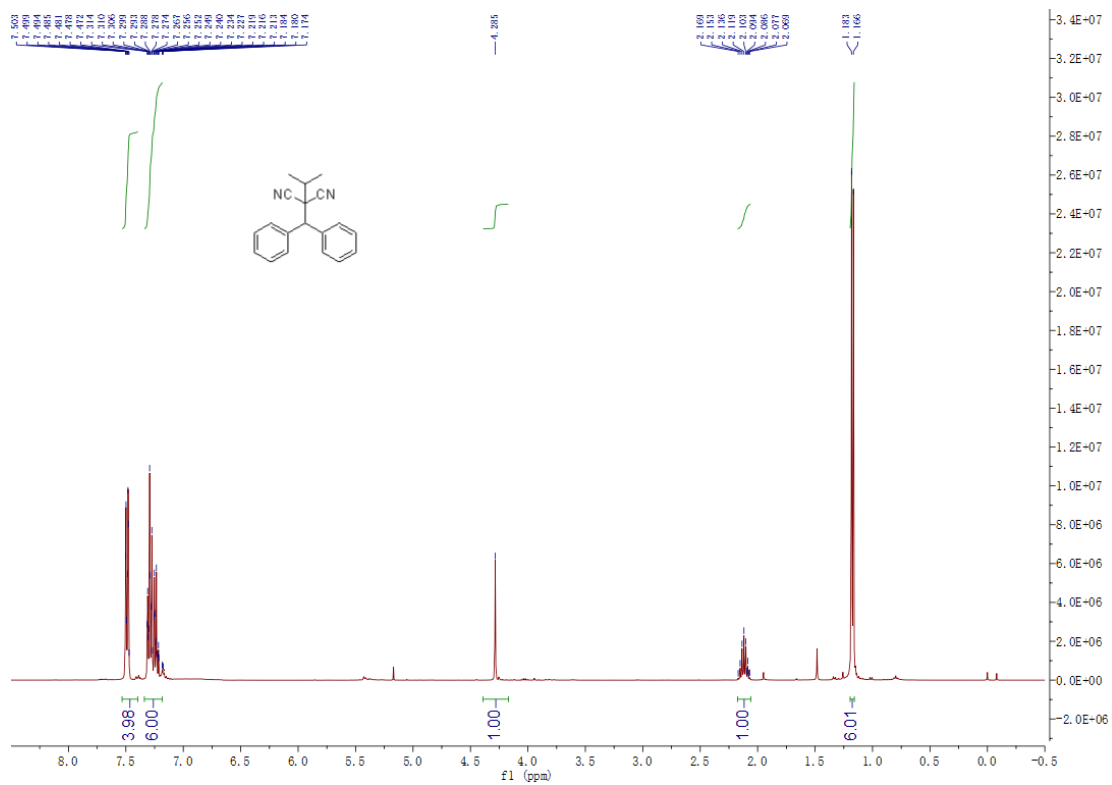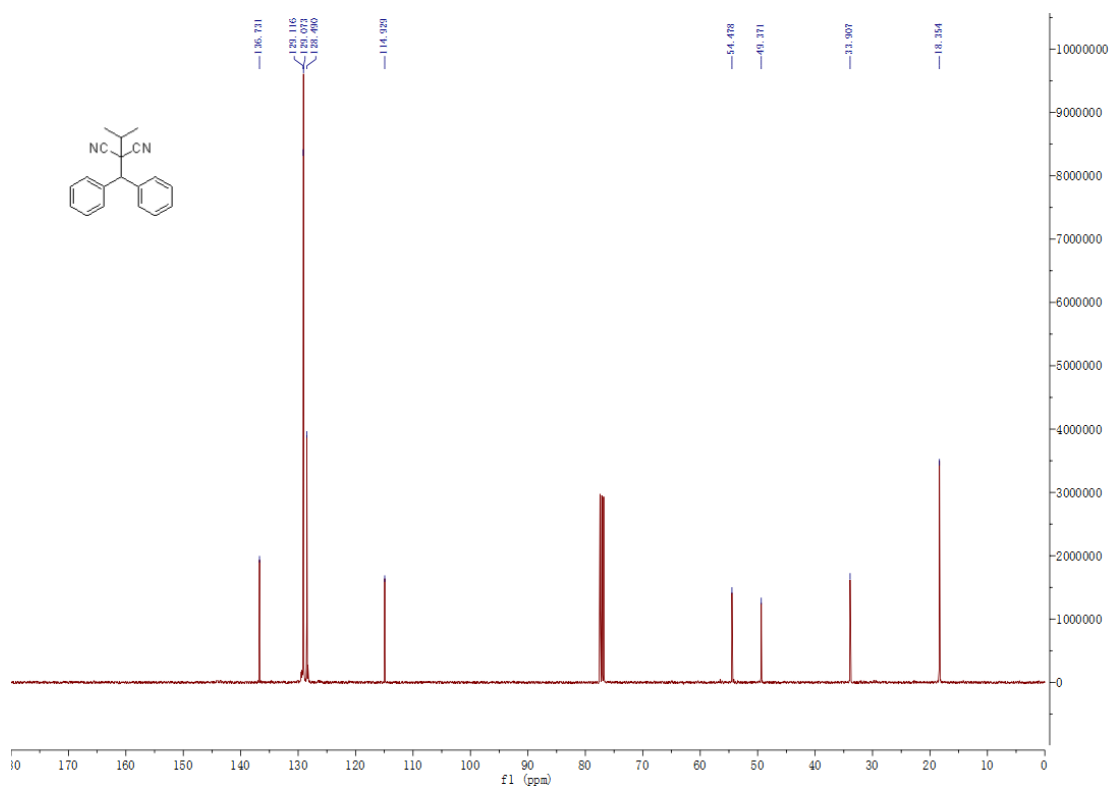

Chemical structure: N#CC(=C1C=CC=CC=C1)C(=C2C=CC=CC=C2)C#N

<sup>1</sup>H NMR spectrum (CDCl<sub>3</sub>) showing aromatic signals (7.0-7.6 ppm) and a singlet at 4.44 ppm. Integration values are 10.02 and 1.00.

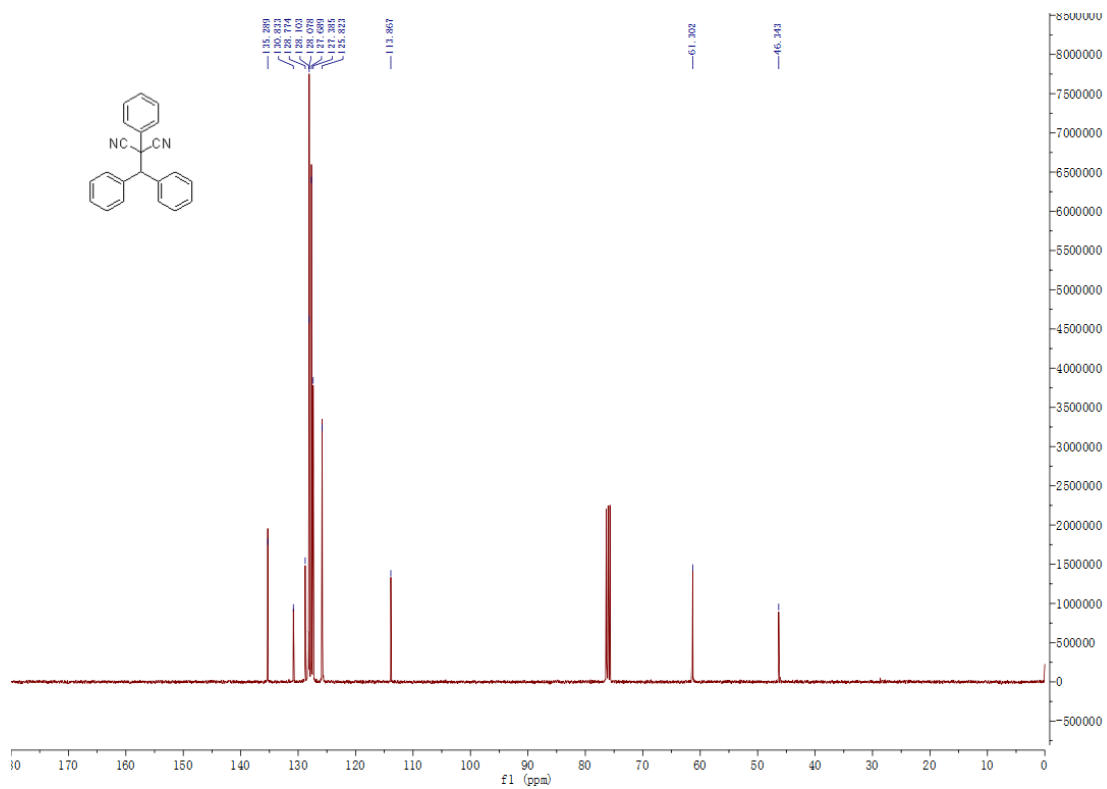

9d

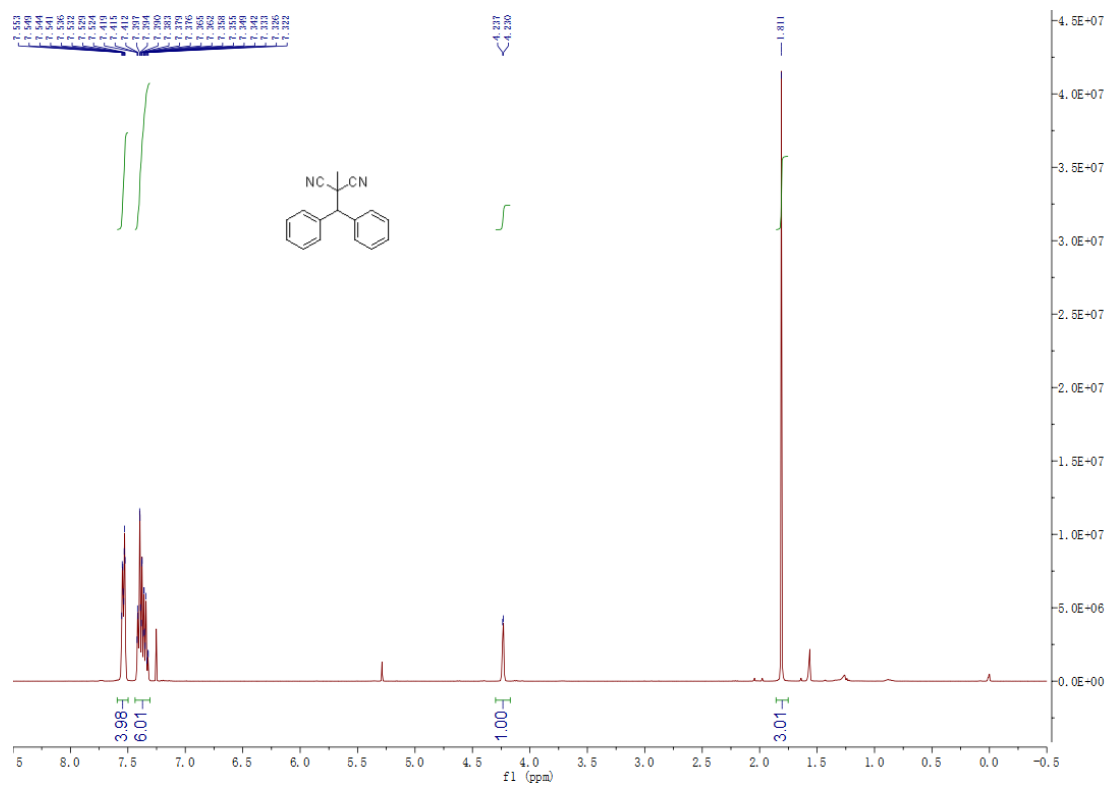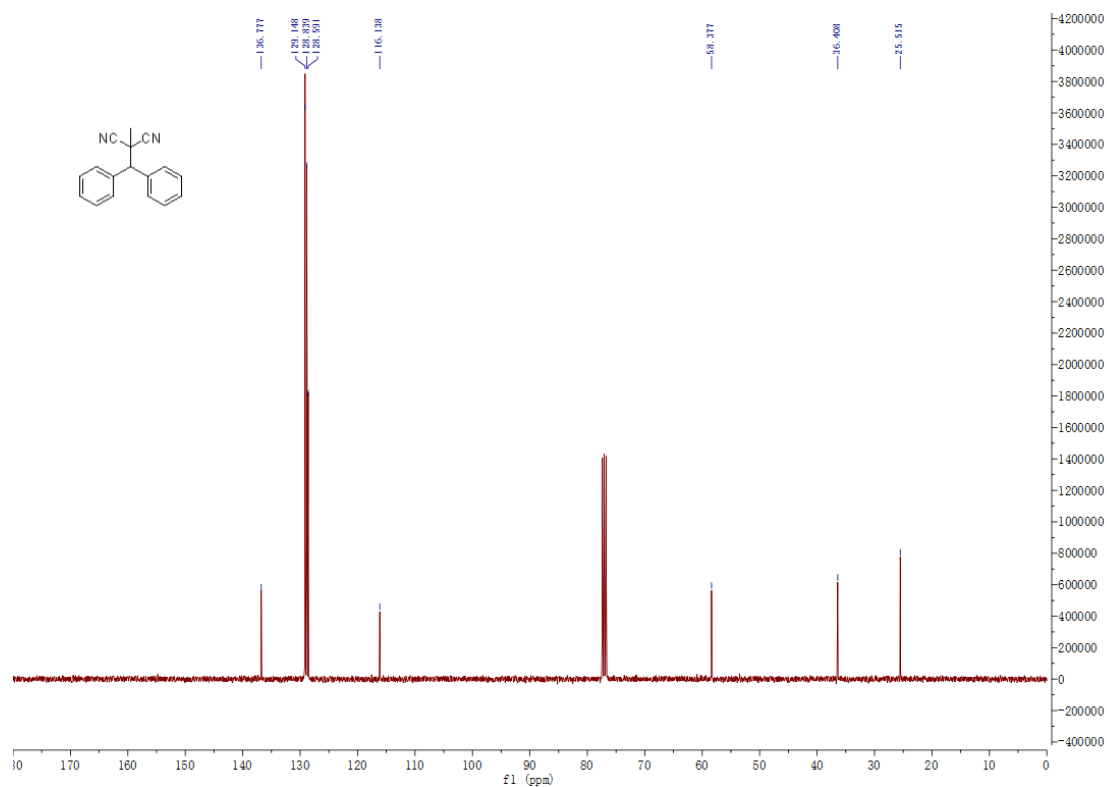



Chemical structure: CC1=CC=C(C=C1)C(NC(=O)OC2=CC=CC=C2)C3=CC=CC=C3

<sup>1</sup>H NMR spectrum (CDCl<sub>3</sub>) showing peaks and integrations:

| Chemical Shift (ppm) | Integration |
|----------------------|-------------|
| 7.80 - 7.60          | 1.02        |
| 7.50 - 7.40          | 2.00        |
| 7.30 - 7.20          | 3.02        |
| 7.10 - 7.00          | 2.00        |
| 6.90 - 6.80          | 0.98        |
| 6.70 - 6.60          | 1.00        |
| 6.50 - 6.40          | 3.01        |
| 6.30 - 6.20          | 1.00        |
| 6.10 - 6.00          | 1.00        |
| 5.60                 | 1.00        |
| 3.80                 | 2.99        |
| 2.30                 | 2.98        |

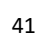

11

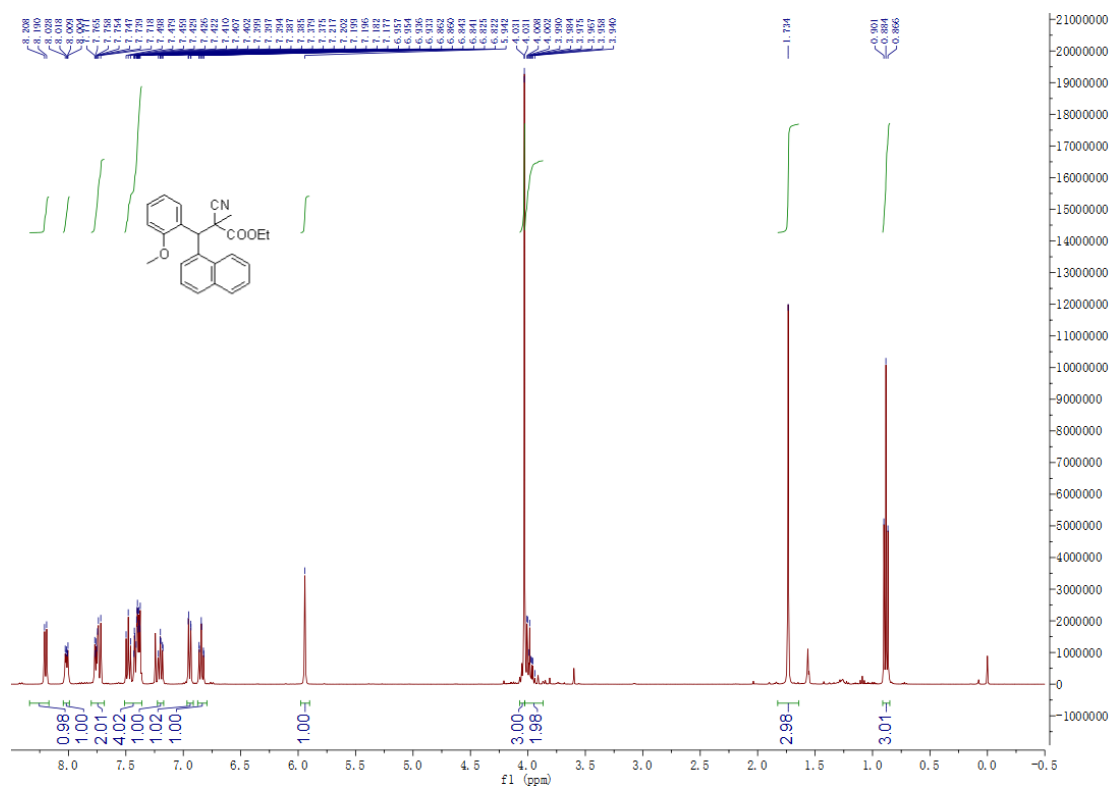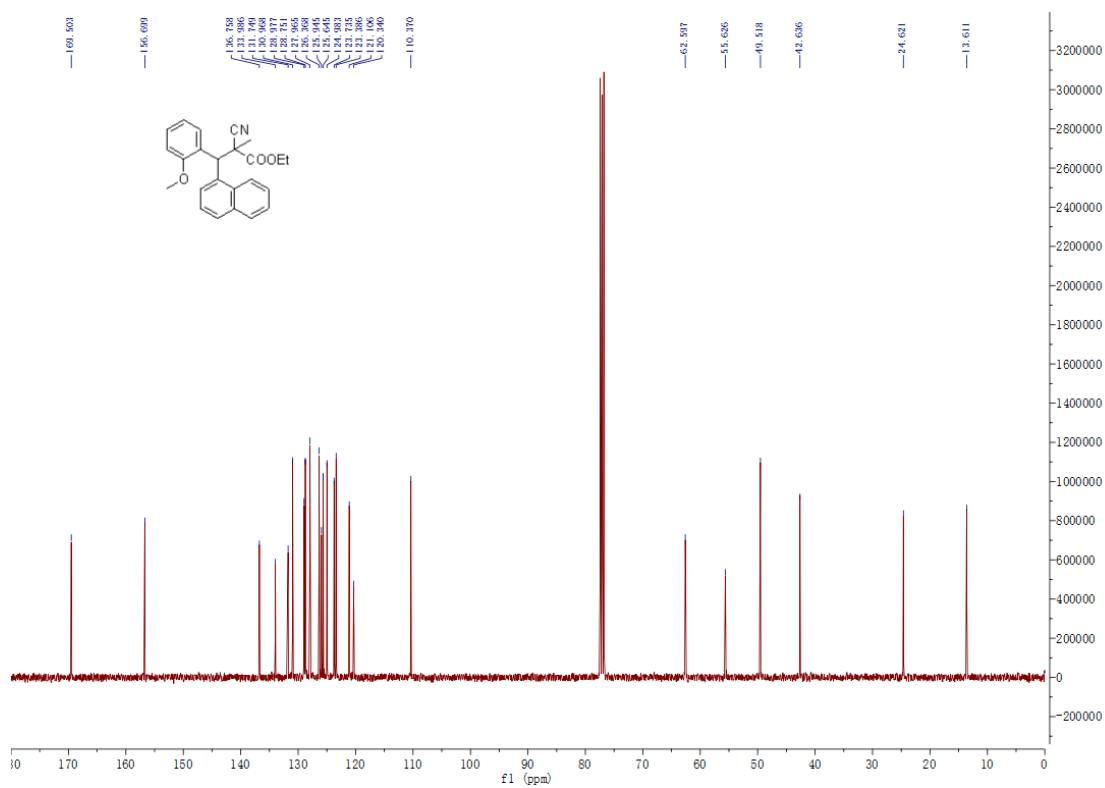

12

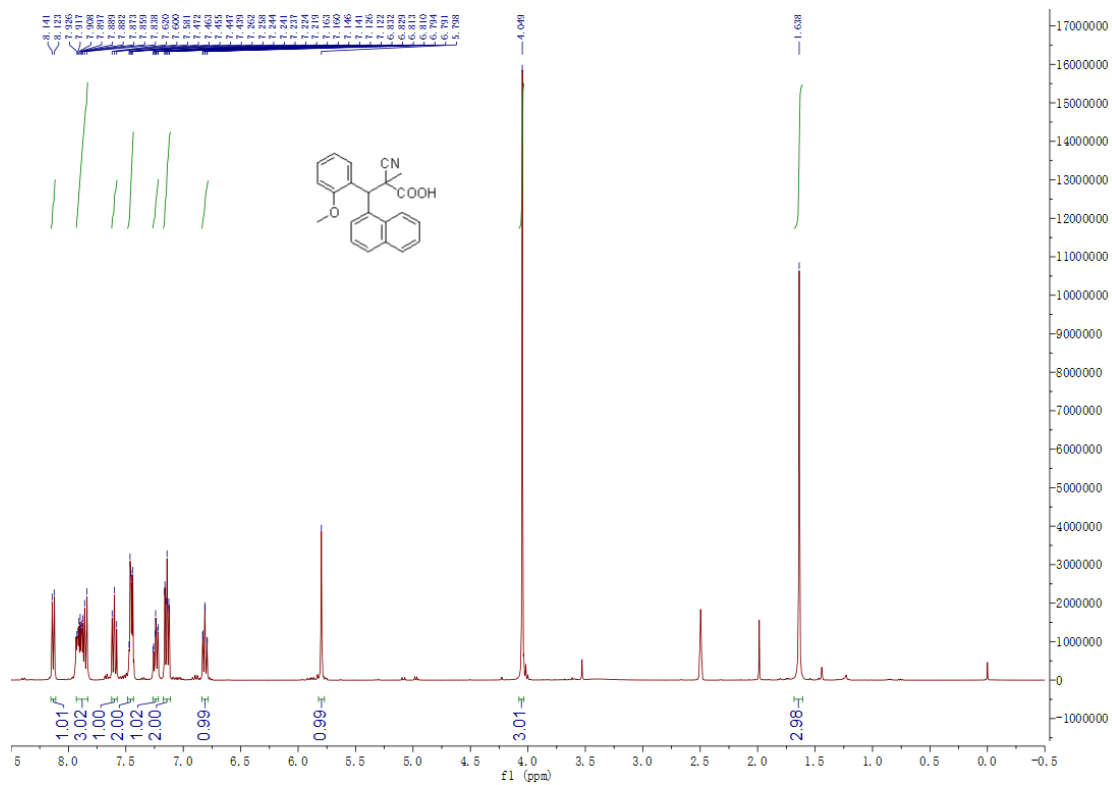

13

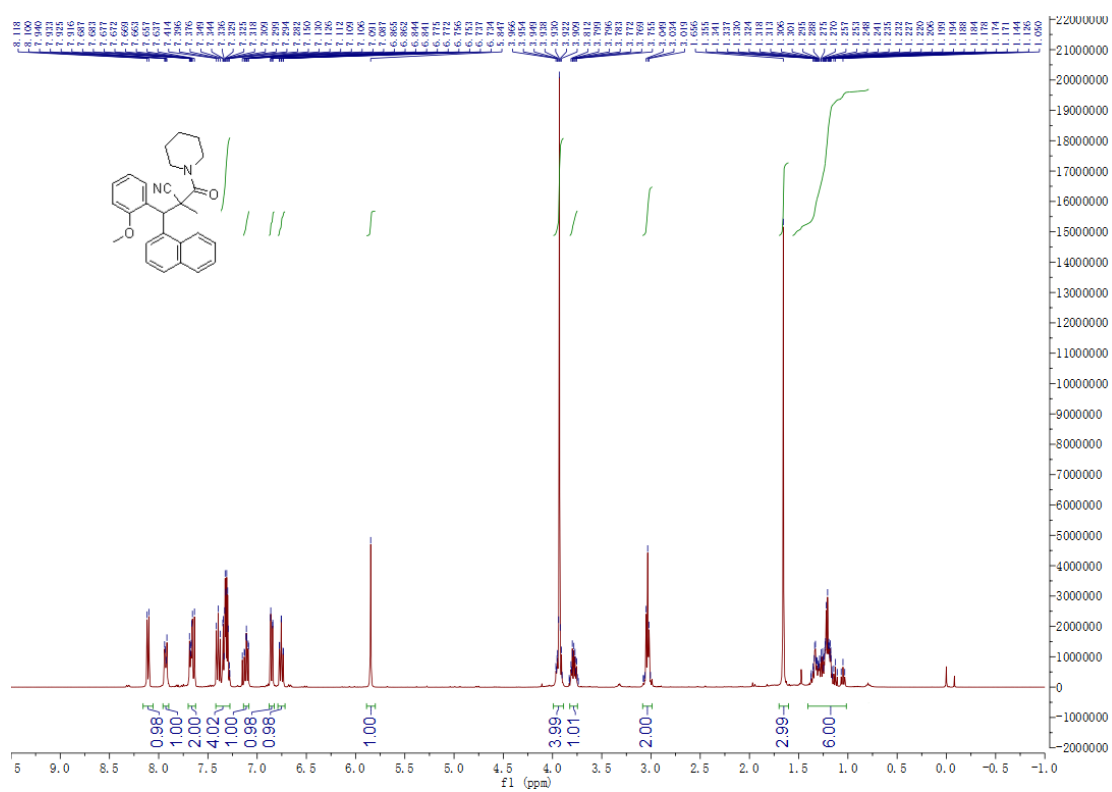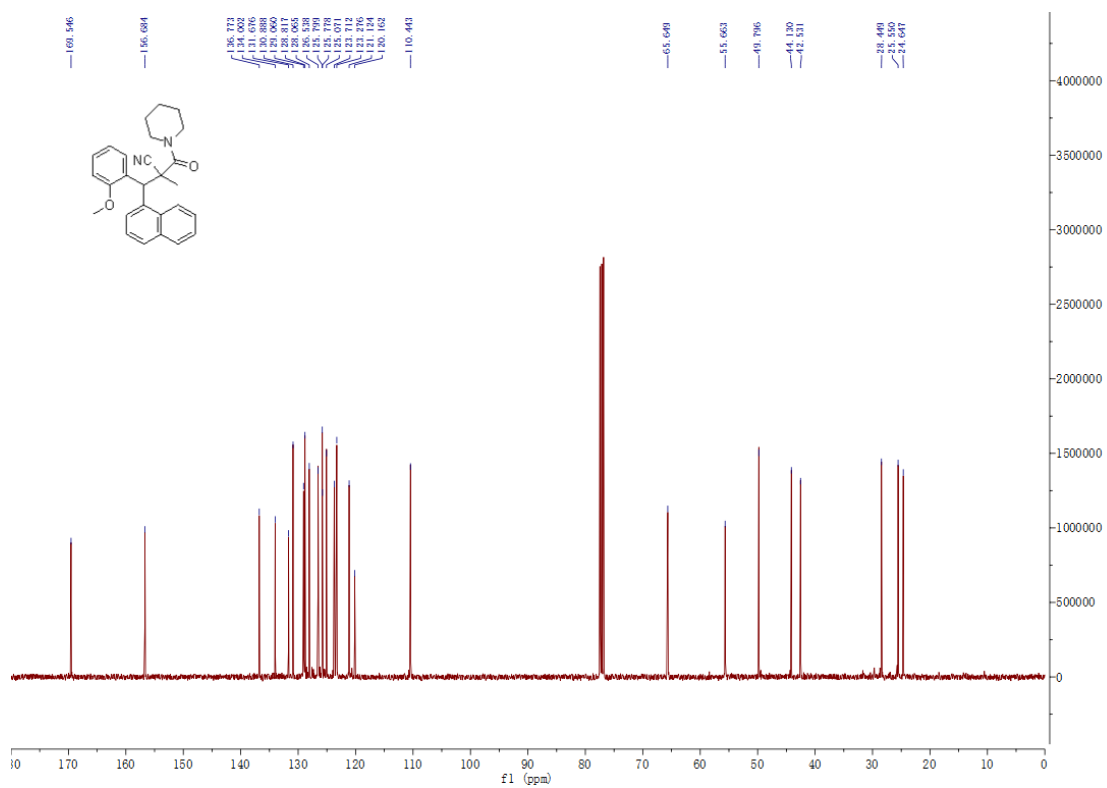

Supplement: c7ob01025g1.pdf [file c7ob01025g1.pdf]
